# Supplementary material for: Perancangan dan pembuatan interface alat penala gitar akustik dengan penggerak motor menggunakan mikrokontroler MCS-51
Source: Royal Society of Chemistry journal article supplement (doi:10.1039/b500919g), 1995-01-01
Supplement: b500919g.pdf [file b500919g.pdf]

## A concise and diastereoselective total synthesis of *cis* and *trans*-pterocarpan

### Electronic Supplementary Information Experimental

#### General

Infrared spectra were recorded in liquid film between NaCl plates on a FT-IR Mattson Genesis II. NMR spectra were determined on a Bruker Avance DPX 300 and Bruker Avance-500.  $^1\text{H}$  NMR and  $^{13}\text{C}$  NMR spectra were recorded in deuterated solvent and are reported to trimethylsilane. Carbon substitution degrees were established by DEPT multipulse sequence, and  $^{13}\text{C}$  NMR peak assignments were made with the aid of 2D NMR (HMBC, HMQC, COSY and NOESY). LRMS were determined on a Hewlett–Packard 5988A instrument. HRMS were registered on an Autospec-Q VG Analytical (FISONS) mass spectrometer. RX data were determined on a Bruker SMART APEX CCD instrument. All solvents were purified and dried following standard procedures<sup>1</sup>.

#### Allyl *p*-methoxyphenyl ether (**6**)

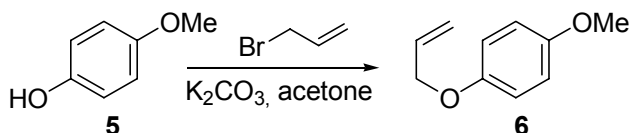

To a stirred solution of **5** (5 g, 40.27 mmol) in acetone (30 mL), K<sub>2</sub>CO<sub>3</sub> (5.56 g, 40.27 mmol) and allyl bromide (5.45 mL, 48.32 mmol) were added. The resulting solution was heated to reflux for 4 hours. The mixture was then diluted with CH<sub>2</sub>Cl<sub>2</sub> (100 mL) and washed with NaOH 2M. The organic layer was dried over anhyd. Na<sub>2</sub>SO<sub>4</sub>, and the solvent was removed. The residue was submitted to flash chromatography (hexane/Et<sub>2</sub>O 85:15), affording **6** (6.31 g, 38.47 mmol, 95%), as colourless oil: IR (film)  $\nu_{\text{max}}$  3074, 2999, 2942, 2839, 1593, 1509, 1457, 1227, 1034, 827 cm<sup>-1</sup>;  $^1\text{H}$  NMR (CDCl<sub>3</sub>, 300 MHz)  $\delta$  6.87 (4H, m, H-2, 3, 5, 6), 6.09 (1H, ddt,  $J$ = 17.3,  $J$ = 10.4,  $J$ = 5.2 Hz, H-2'), 5.43 (1H, dq,  $J$ = 17.3,  $J$ = 1.6 Hz, H-3'*t*), 5.30 (1H, dq,  $J$ = 10.4,  $J$ = 1.6 Hz, H-3'*c*), 4.51 (2H, dt,  $J$ = 5.2,  $J$ = 1.6 Hz, H-1'), 3.79 (3H, s, OCH<sub>3</sub>);  $^{13}\text{C}$  NMR (CDCl<sub>3</sub>, 75 MHz)  $\delta$  153.88 (C, C-4\*), 152.72 (C, C-1\*), 133.60 (CH, C-2'), 117.37 (CH<sub>2</sub>, C-3'), 115.69 (CH, C-3, C-5), 114.56 (CH, C-2, C-6), 69.46 (CH<sub>2</sub>, C-1'), 55.63 (OCH<sub>3</sub>). \* may be interchanged; HREIMS ( $m/z$ ) calcd. for C<sub>10</sub>H<sub>12</sub>O<sub>2</sub> 164.0837 [M]<sup>+</sup>, found 164.0836.

<sup>1</sup> Casey, M.; Leonard, J.; Lygo, B.; Procter, G. "Advanced Practical Organic Chemistry" Chapman and Hall, New York, 1990.

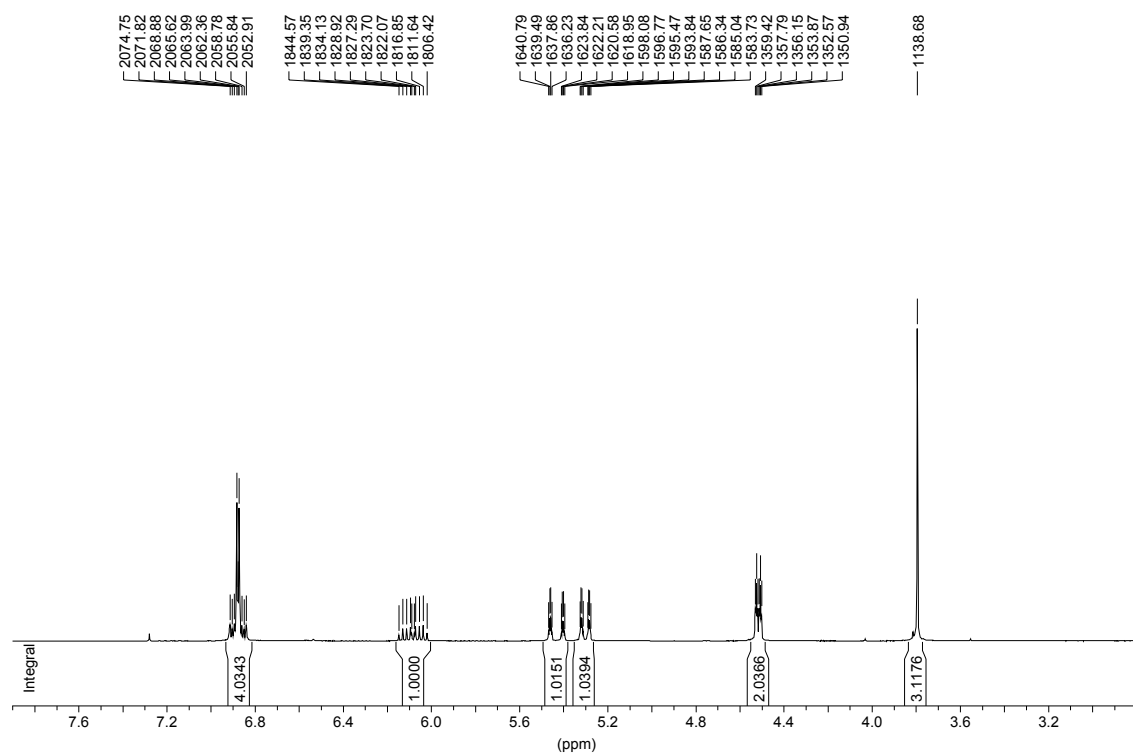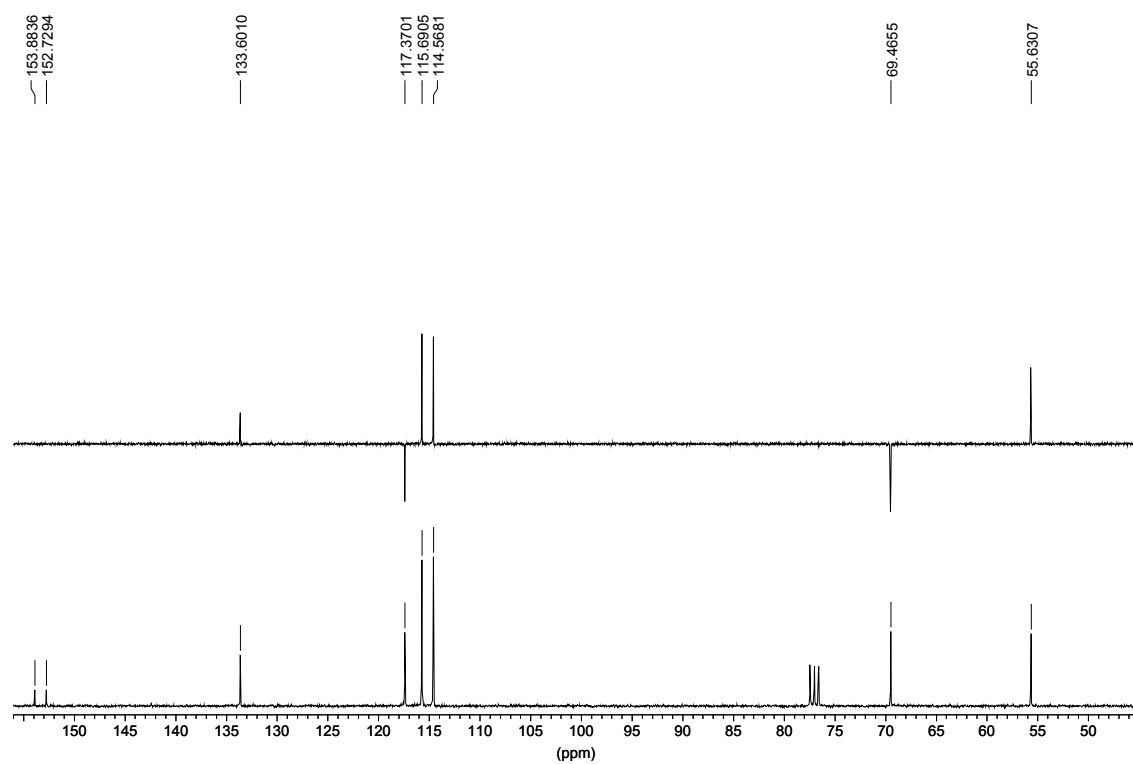

## 2-Allyl-4-methoxy-phenol (7)

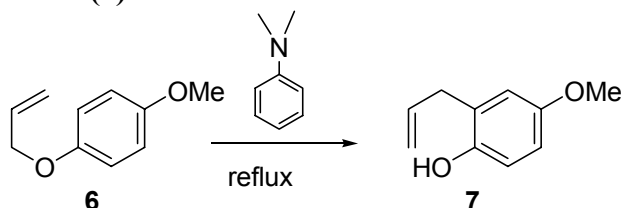

Compound **6** (6.31 g, 38.47 mmol) was dissolved under N<sub>2</sub> atmosphere in 10 mL (79.38 mmol) of *N,N*-dimethylaniline. The solution was heated to reflux for 10h. The mixture was diluted with CH<sub>2</sub>Cl<sub>2</sub> (100 mL), and washed with HCl 5% (3 x 50 mL). The dried (Na<sub>2</sub>SO<sub>4</sub>) extract was concentrated *in vacuo* and purified by chromatography over silica gel, eluting with hexane/ Et<sub>2</sub>O 9:1, to give **7** (5.86 g, 35.78 mmol, 93%) as colourless oil: IR (film)  $\nu_{\text{max}}$ , 3414, 3074, 2944, 2836, 1615, 1504, 1437, 1207, 808 cm<sup>-1</sup>; <sup>1</sup>H NMR (CDCl<sub>3</sub>, 300 MHz)  $\delta$  6.68-6.79 (3H, m, H-3, 5, 6), 6.03 (1H, ddt, *J*= 17.8, *J*= 9.8, *J*= 6.3 Hz, H-2'), 5.17 (2H, m, H-3'), 5.01 (1H, bs, OH), 3.79 (3H, s, OCH<sub>3</sub>) 3.41 (2H, dt, *J*= 6.3, *J*= 1.6 Hz, H-1'); <sup>13</sup>C NMR (CDCl<sub>3</sub>, 75 MHz)  $\delta$  153.66 (C, C-4), 147.92 (C, C-1), 136.16 (CH, C-2'), 126.62 (C, C-2), 116.41 (CH<sub>2</sub>, C-3'), 116.41 (CH, C-6\*), 115.92 (CH, C-3\*), , 112.57 (CH, C-5), 55.71 (OCH<sub>3</sub>), 35.11 (CH<sub>2</sub>, C-1'). \* may be interchanged; HREIMS (*m/z*) calcd. for C<sub>10</sub>H<sub>12</sub>O<sub>2</sub> 164.0837 [M]<sup>+</sup>, found 164.0835.

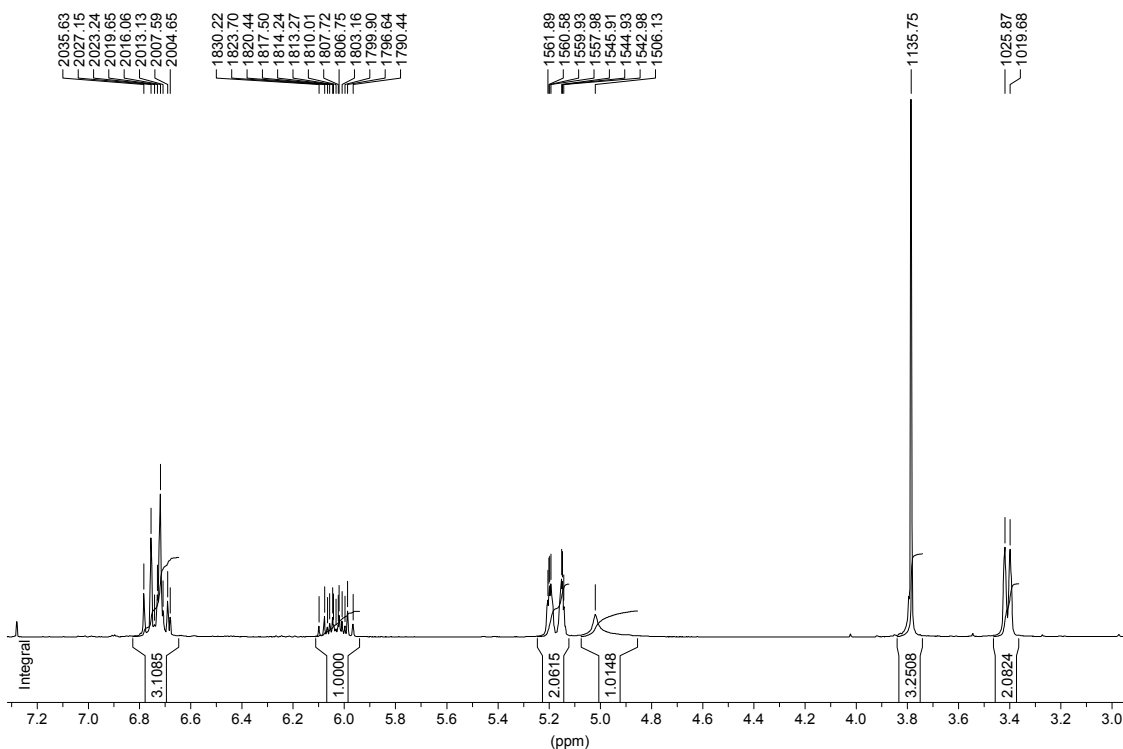

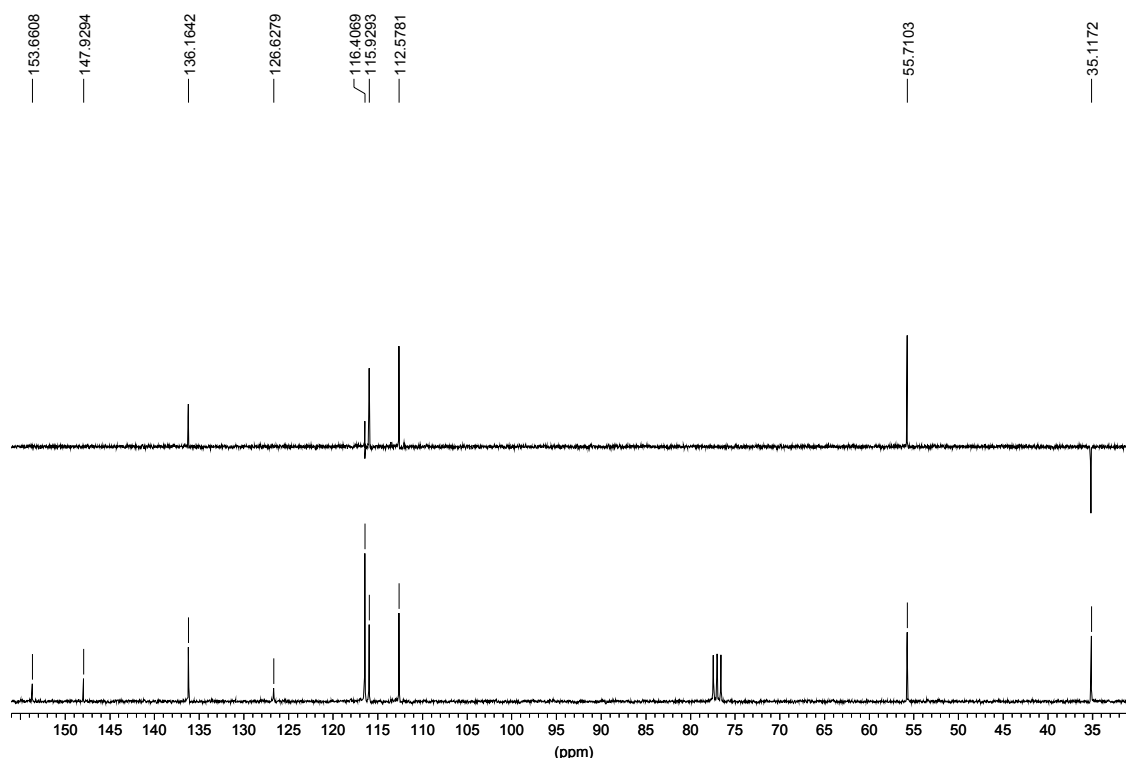

#### 4-Methoxy-2-(1-propenyl)phenol (**15**)

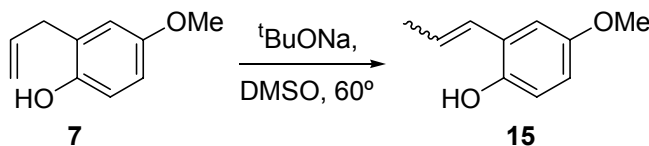

Compound **7** (5.86 g, 35.78 mmol) was dissolved in 125 mL of DMSO, under N<sub>2</sub> atmosphere, and sodium *tert*-butoxide (13.7 g, 143 mmol) was added. The mixture was stirred at 60°C for 12 h, then was cooled to 0°C and quenched by addition of HCl 5% (100 mL). The aqueous layer was extracted with CH<sub>2</sub>Cl<sub>2</sub> (3 x 100 mL). After washing with brine, the dried (Na<sub>2</sub>SO<sub>4</sub>) extract was concentrated *in vacuo* and purified by chromatography over silica gel, eluting with hexane/ Et<sub>2</sub>O 9:1, to give product **15** (4.86 g, 29.6 mmol, 83%) as a colourless oil and a mixture of *cis* /*trans* isomers (1:12): IR (film)  $\nu_{\max}$ , 3472, 2947, 2838, 1605, 1499, 1435, 1354, 1276, 1204, 810 cm<sup>-1</sup>; <sup>1</sup>H NMR (CDCl<sub>3</sub>, 300 MHz), (*signals of trans isomer*)  $\delta$  6.62 (1H, dq, *J* = 15.8 Hz, *J* = 1.8 Hz, H-1'), 6.22 (1H, dq, *J* = 15.8, *J* = 6.7 Hz, H-2'), 1.92 (3H, dd, *J* = 6.7, *J* = 1.8 Hz, H-3'), (*signals of cis isomer*)  $\delta$  6.41 (1H, dq, *J* = 11.5, *J* = 1.9 Hz, H-1'), 6.00 (1H, dq, *J* = 11.5, *J* = 6.4 Hz, H-2'), 1.77 (3H, dd, *J* = 6.4, *J* = 1.9 Hz, H-3'), (*signals of both*)  $\delta$  6.91 (1H, d, *J* = 2.9 Hz, H-3), 6.74 (1H, d, *J* = 8.8 Hz, H-6), 6.68 (1H, dd, *J* = 8.8, *J* = 2.9 Hz, H-5), 5.38 (1H, bs, OH), 3.79 (3H, s, OCH<sub>3</sub>); <sup>13</sup>C NMR (CDCl<sub>3</sub>, 75 MHz) (*signals of trans isomer*),  $\delta$  128.03 (CH, C-1'), 125.31 (CH, C-2'), 18.77 (CH<sub>3</sub>, C-3'), (*signals of cis isomer*)  $\delta$  130.80 (CH, C-1'), 124.15 (CH, C-2'), 14.54 (CH<sub>3</sub>, C-3'). (*signals of both*)  $\delta$  153.54 (C, C-4), 146.60 (C, C-1), 125.88 (C, C-2), 116.50 (CH, C-6), 113.49 (CH, C-5), 111.98 (CH, C-3), 55.77 (OCH<sub>3</sub>); HREIMS (*m/z*) calcd. for C<sub>10</sub>H<sub>12</sub>O<sub>2</sub> 164.0837 [M]<sup>+</sup>, found 164.0834.

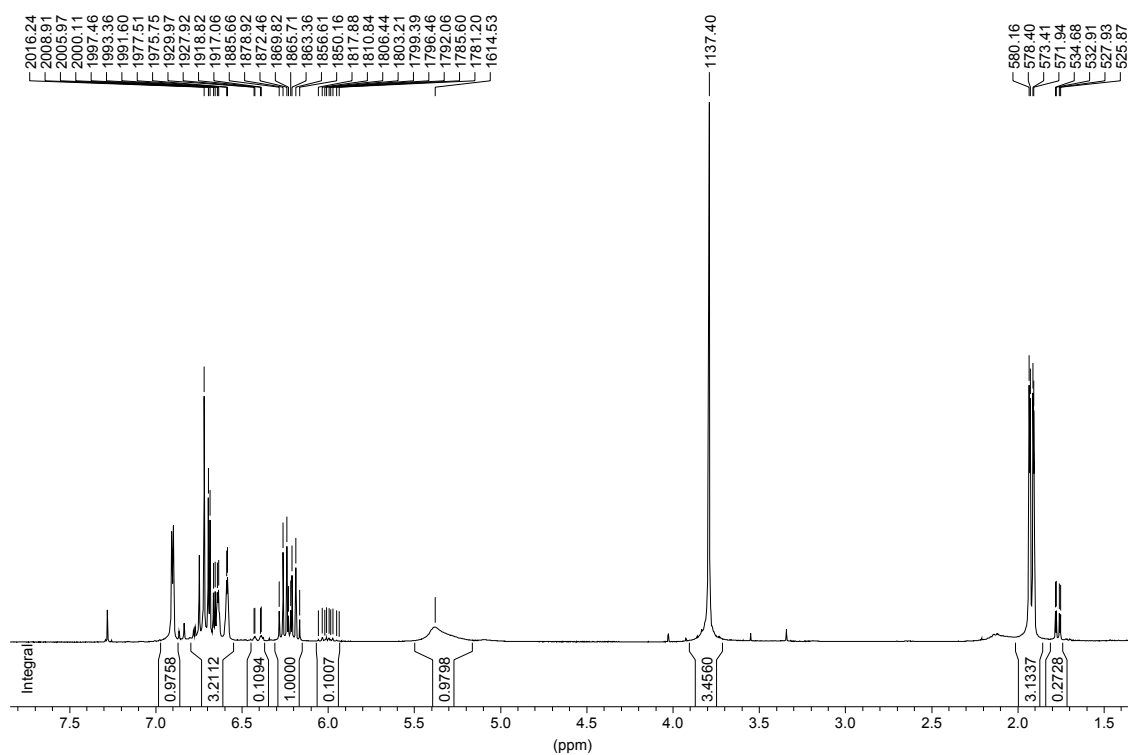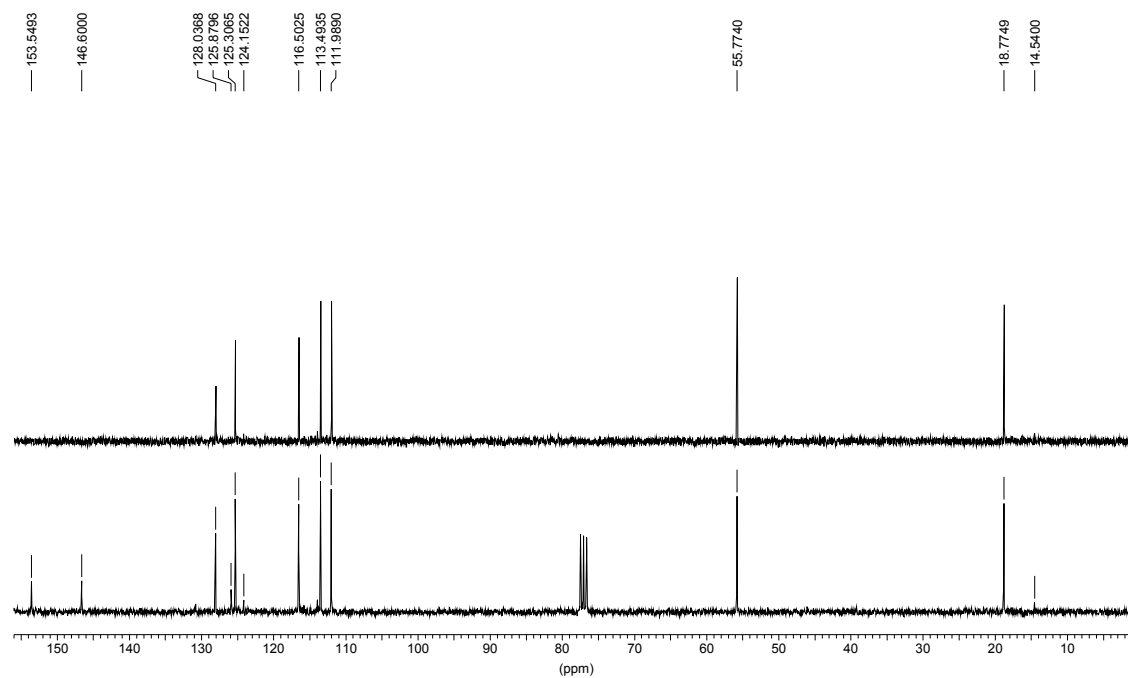

**Allyl-(4-methoxy-2-propenyl-phenoxy)-dimethylsilane (8)**

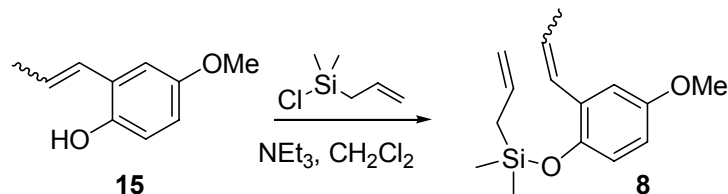

Compound **15** (4.86 g, 29.6 mmol) was dissolved in anhydrous  $\text{CH}_2\text{Cl}_2$  (200 mL) at  $0^\circ\text{C}$  under  $\text{N}_2$  atmosphere.  $\text{NEt}_3$  anhydrous (4.9 mL, 35.52 mmol) and allylchlorodimethylsilane (4.75 mL, 32.56 mmol) were added. The reaction mixture was stirred at  $0^\circ\text{C}$  for 4h, and then, a saturated solution of  $\text{NaHCO}_3/\text{H}_2\text{O}$  was added. The whole mixture was extracted with  $\text{CH}_2\text{Cl}_2$  (3 x 75 mL). The organic layer was dried over anhyd.  $\text{Na}_2\text{SO}_4$ , and concentrated *in vacuo*. Flash chromatography (hexane:  $\text{Et}_2\text{O}$ , 98:2) of the residue gave **8** (10.7 g, 41 mmol, 87%) (*cis:trans* 1:8) as a colourless oil: IR (film)  $\nu_{\text{max}}$ , 2956, 1626, 1489, 1429, 1262, 1215, 904, 827  $\text{cm}^{-1}$ ;  $^1\text{H}$  NMR ( $\text{CDCl}_3$ , 300 MHz), (*signals of trans isomer*)  $\delta$  6.64 (1H, dq,  $J=15.8$ ,  $J=1.9$  Hz, H-1'), 6.20 (1H, dq,  $J=15.8$ ,  $J=6.5$  Hz, H-2'), 1.91 (3H, dd,  $J=6.5$ ,  $J=1.9$  Hz, H-3'), (*signals of cis isomer*)  $\delta$  1.87 (3H, dd,  $J=7.1$ ,  $J=1.9$  Hz, H-3'), (*signals of both*)  $\delta$  6.96 (1H, d,  $J=2.9$  Hz, H-3), 6.74 (1H, d,  $J=8.7$  Hz, H-6), 6.67 (1H, dd,  $J=8.7$ ,  $J=2.9$  Hz, H-5), 5.84 (1H, ddt,  $J=16.8$ ,  $J=10.0$ ,  $J=8.1$  Hz, H-2''), 4.97 (2H, m, H-3''), 3.79 (3H, s,  $\text{OCH}_3$ ), 1.79 (2H, d,  $J=8.1$  Hz, H-1''), 0.26 (6H, s,  $\text{SiMe}_2$ );  $^{13}\text{C}$  NMR ( $\text{CDCl}_3$ , 75 MHz)  $\delta$  154.23 (C, C-4), 145.80 (C, C-1), 133.34 (CH, C-2''), 129.81 (C, C-2), 126.15, 126.13 (CH, C-1', C-2'), 120.37 (CH, C-6), 114.24 ( $\text{CH}_2$ , C-3''), 113.02 (CH, C-5), 110.89 (CH, C-3), 55.49 ( $\text{OCH}_3$ ), 24.63 ( $\text{CH}_2$ , C-1''), 18.74 ( $\text{CH}_3$ , C-3'), -1.75 ( $\text{SiMe}_2$ ). HREIMS ( $m/z$ ) calcd. for  $\text{C}_{15}\text{H}_{22}\text{O}_2\text{Si}$  262.1389  $[\text{M}]^+$ , found 262.1385.

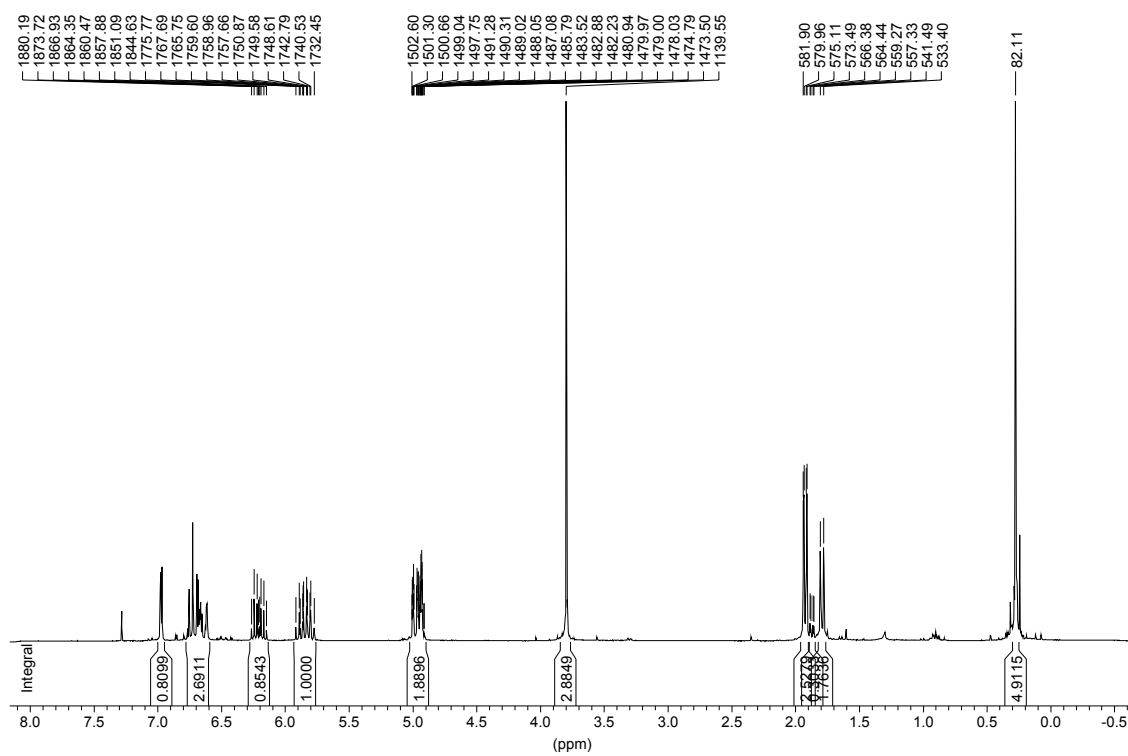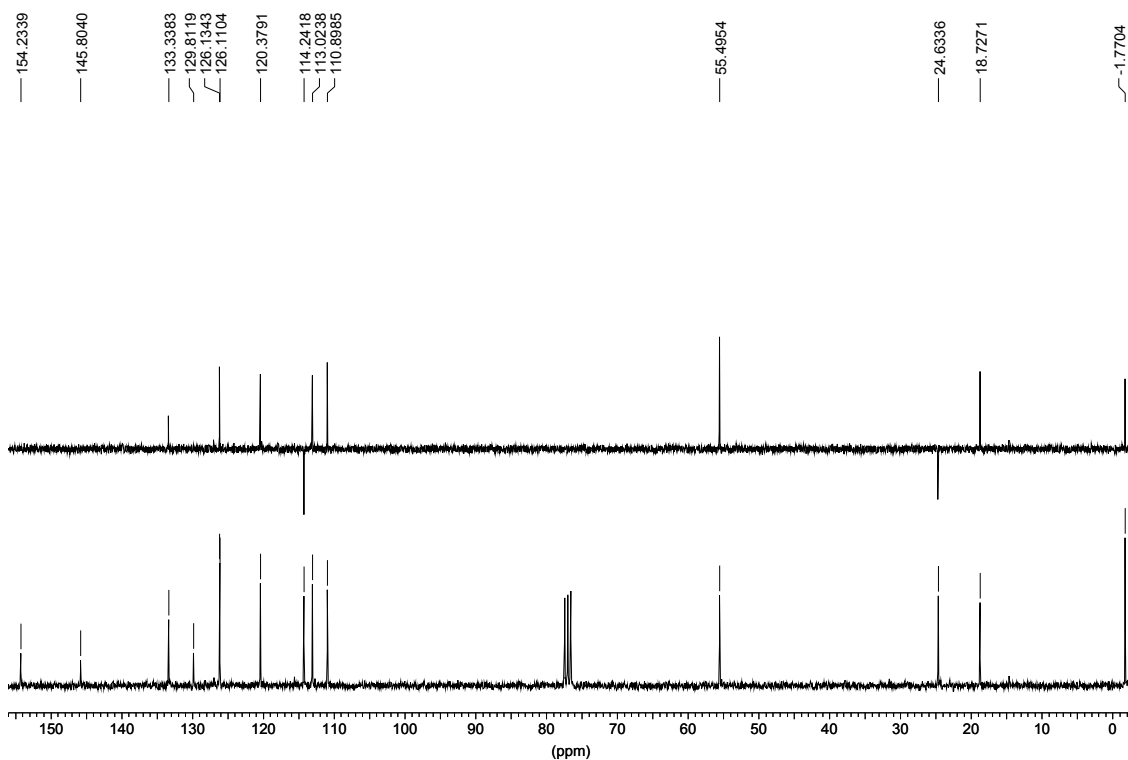

2,2-Dimethyl-7-methoxy-2,3-dihydrobenzo[f][1,2]oxasilepin (9)

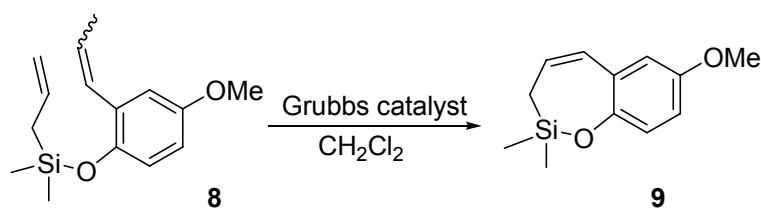

A) Benzyliden-bis-(tricyclohexylphosphine)dichlororuthenium (391 mg, 0.47 mmol) was added to a 0.01 M stirred solution of **8** (826 mg, 3.16 mmol) in degasified anhyd. CH<sub>2</sub>Cl<sub>2</sub>. The mixture was stirred under reflux for 17 h, and then Pb(AcO)<sub>4</sub> (0.59 mmol) was added, and the slurry stirred at room temperature for 18 h. After that, the mixture was filtered through silica and washed with CH<sub>2</sub>Cl<sub>2</sub>. The solvent was removed *in vacuo*. Flash chromatography (hexane: Et<sub>2</sub>O, 98:2) of the residue gave **9** (445 mg, 2.02 mmol, 76%) as a colourless oil IR (film)  $\nu_{\max}$  3013, 2950, 2839, 1609, 1490, 1418, 1259, 1220, 1144, 1042, 935, 890, 842, 811 cm<sup>-1</sup>; <sup>1</sup>H NMR (CDCl<sub>3</sub>, 300 MHz)  $\delta$  6.87 (1H, d, *J* = 8.9 Hz, H-9), 6.73 (1H, dd, *J* = 8.9, *J* = 3.1 Hz, H-8), 6.63 (1H, d, *J* = 3.1 Hz, H-6), 6.33 (1H, d, *J* = 10.8 Hz, H-5), 6.09 (1H, dt, *J* = 10.8, *J* = 7.4 Hz, H-4), 3.78 (3H, s, OCH<sub>3</sub>), 1.57 (2H, d, *J* = 7.4 Hz, H-3), 0.31 (6H, SiMe<sub>2</sub>); <sup>13</sup>C NMR (CDCl<sub>3</sub>, 75 MHz)  $\delta$  153.81 (C, C-7), 147.10 (C, C-9a), 129.01 (C, C-5a), 128.62 (CH, C-4), 126.36 (CH, C-5), 121.83 (CH, C-9), 114.64 (CH, C-6), 113.87 (CH, C-8), 55.55 (OCH<sub>3</sub>), 18.18 (CH<sub>2</sub>, C-3), -0.73 (SiMe<sub>2</sub>). HREIMS (*m/z*) calcd. for C<sub>12</sub>H<sub>16</sub>O<sub>2</sub>Si 220.0919 [M]<sup>+</sup>, found 220.0919.

B) [1,3-Bis-(2,4,6-trimethylphenyl)-2-imidazolidinylidene]dichloro(phenylmethylene)-(tricyclohexylphosphine)ruthenium] (24 mg, 0.028 mmol) was added to a stirred solution 0.02 M of **8** (1.50 g, 5.72 mmol) in anhyd., under N<sub>2</sub> atmosphere. The mixture was stirred under reflux for 30 min, and then, the solvent was removed *in vacuo*. Flash chromatography (hexane: Et<sub>2</sub>O, 98:2) of the residue gave **9** (1.13 g, 5.15 mmol, 90%)



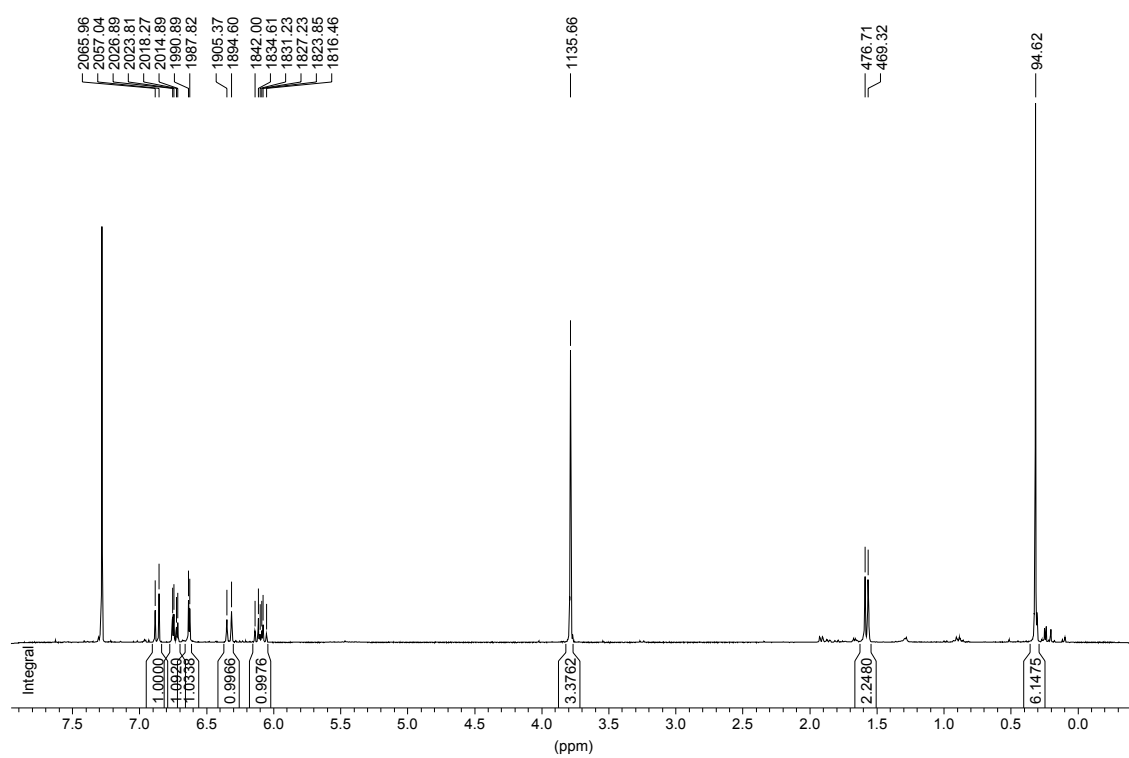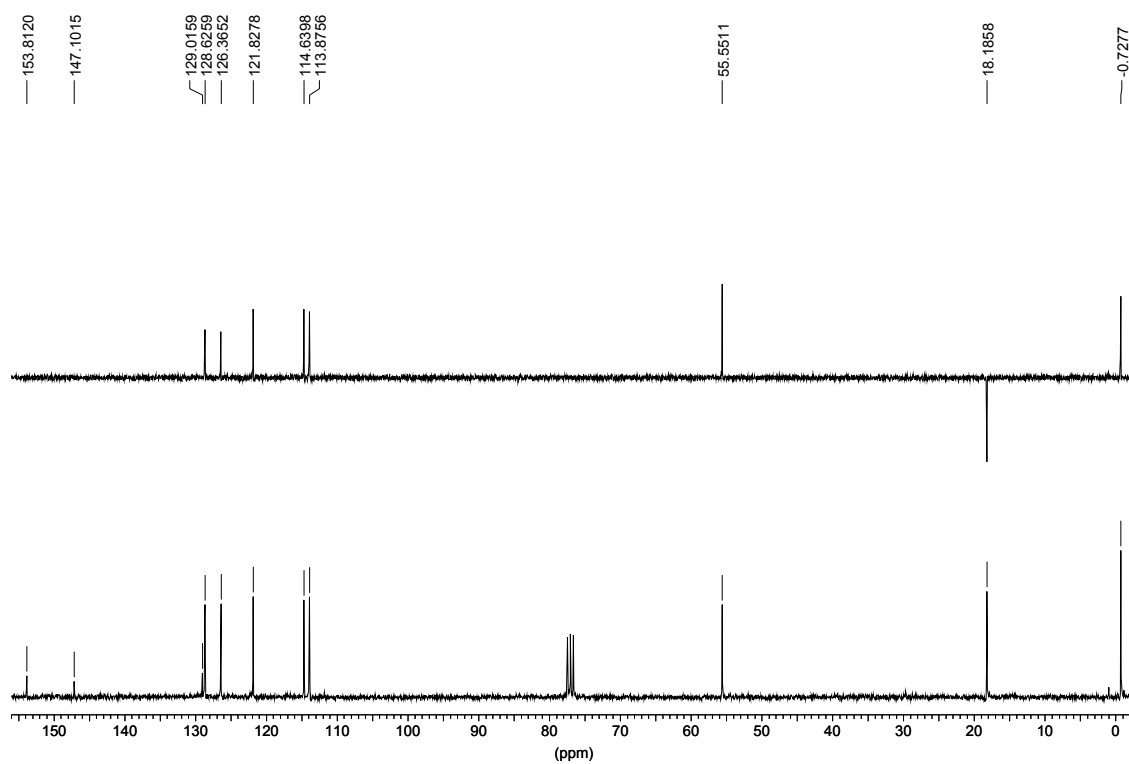

**5-Methoxy-2-pivaloyloxybenzaldehyde (10).**

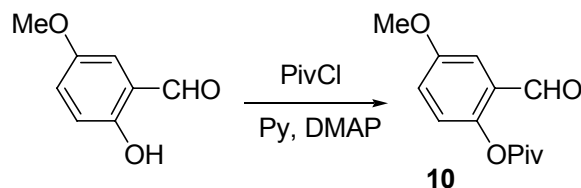

To a solution of 2-hydroxy-5-methoxybenzaldehyde (1 g, 6.57 mmol) in anhydrous  $\text{CH}_2\text{Cl}_2$  (75 mL) under  $\text{N}_2$  atmosphere, DMAP (80 mg, 0.66 mmol), anhyd. pyridine (1.6 mL, 19.71 mmol) and pivaloyl chloride (2.3 mL, 18.4 mmol) were added. The mixture was heated to reflux for 6 h, then quenched with HCl 5% (50 mL), and extracted with  $\text{CH}_2\text{Cl}_2$  (3 x 50 mL). The organic layer was dried over anhyd.  $\text{Na}_2\text{SO}_4$ , and the solvent was removed. Flash chromatography of the residue (hexane:Et<sub>2</sub>O 9:1) afforded **10** (1.32 g, 5.6 mmol, 85%), as a colourless oil: <sup>1</sup>H NMR ( $\text{CDCl}_3$ , 300 MHz):  $\delta$ (ppm) 10.10 (1H, s, CHO), 7.37 (1H, d,  $J=3.0$  Hz, H-3), 7.17 (1H, dd,  $J=8.9$ ,  $J=3.0$  Hz, H-4), 7.05 (1H, d,  $J=8.9$  Hz, H-6), 3.85 (3H, s, OCH<sub>3</sub>), 1.41 (9H, s,  $\text{OCOC}(\text{CH}_3)_3$ ); <sup>13</sup>C RMN:  $\delta$ (ppm) 185.68 (CH), 175.25 (C), 157.21 (C), 140.66 (C), 130.53 (C), 123.64 (CH), 115.71 (CH), 111.97 (CH), 55.57 (CH<sub>3</sub>), 38.52 (C), 27.06 (C).

**(2*S*\*,3*R*\*)-5-Methoxy-2-(5-methoxy-2-pivaloyloxyphenyl)-3-vinyl-2,3-dihydro-benzofuran (11).**

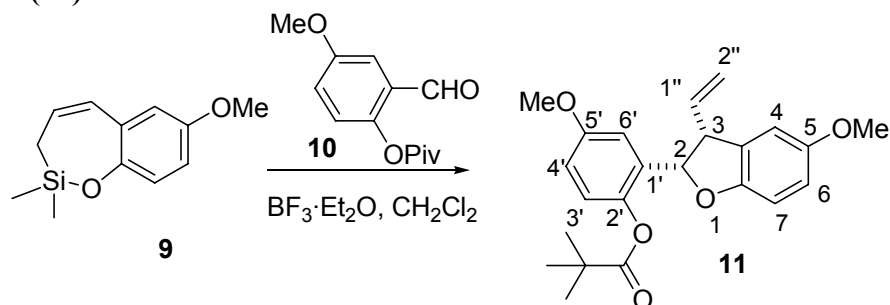

To a stirred solution of **9** (243 mg, 1.1 mmol) in  $\text{CH}_2\text{Cl}_2$  (3 mL) under  $\text{N}_2$  atmosphere at  $-45$  °C,  $\text{BF}_3 \cdot \text{Et}_2\text{O}$  (0.28 mL, 2.2 mmol) was added. After 5 min, a solution of **10** (285 mg, 1.21 mmol) in  $\text{CH}_2\text{Cl}_2$  (2.5 mL) was added dropwise. The reaction mixture was stirred at  $-45$  °C for 2 h and was allowed to warm to room temperature; afterwards was heated to reflux for 17 h, then diluted with  $\text{CH}_2\text{Cl}_2$  and washed with brine. The dried ( $\text{Na}_2\text{SO}_4$ ) extract was concentrated *in vacuo* and purified by chromatography over silica gel, eluting with hexane/ Et<sub>2</sub>O 95:5, to give compound **11** (262 mg, 0.68 mmol, 62%), as a colourless oil: IR (film)  $\nu_{\text{max}}$  3078, 2972, 2936, 2910, 2834, 1750, 1607, 1487, 1429, 1364, 1273  $\text{cm}^{-1}$ ; <sup>1</sup>H NMR ( $\text{CDCl}_3$ , 300 MHz) 7.06 (1H, d,  $J=3.0$  Hz, H-6'), 7.02 (1H, d,  $J=8.9$  Hz, H-3'), 6.87 (1H, d,  $J=8.6$  Hz, H-7), 6.85 (1H, dd,  $J=8.9$ ,  $J=3.0$  Hz, H-4'), 6.78 (1H, dd,  $J=8.6$ ,  $J=2.6$  Hz, H-6), 6.73 (1H, d,  $J=2.6$  Hz, H-4), 5.89 (1H, d,  $J=8.8$  Hz, H-2), 5.37 (1H, ddd,  $J=17.7$ ,  $J=9.2$ ,  $J=7.8$  Hz, H-1''), 5.00 (1H, bd,  $J=17.7$  Hz, H-2''a), 4.93 (1H, dd,  $J=9.2$ ,  $J=1.7$  Hz, H-2''b), 4.22 (1H, dd,  $J=8.8$ ,  $J=7.8$  Hz, H-3), 3.79 (6H, s, OCH<sub>3</sub>), 1.40 (9H, s,  $\text{OCOC}(\text{CH}_3)_3$ ); gNOESY-2D, NOEs observed: 5.89 (4.22), 4.22 (5.89, 5.37, 5.00); <sup>13</sup>C NMR ( $\text{CDCl}_3$ , 75 MHz)  $\delta$  176.56 (C,  $\text{OCOC}(\text{CH}_3)_3$ ), 157.00 (C, C-5'), 154.51 (C, C-5), 153.21 (C, C-7a), 140.96 (C, C-2'), 135.50 (CH, C-1''), 131.24 (C, C-1'), 129.65 (C, C-3a), 122.57 (CH, C-3'), 116.73 (CH<sub>2</sub>, C-2''), 113.95 (CH, C-6), 113.64 (CH, C-4'), 112.11 (CH, C-6'), 111.63 (CH, C-4), 109.72 (CH, C-7), 82.80 (CH, C-2), 55.95 (CH<sub>3</sub>, OCH<sub>3</sub>), 55.54 (CH<sub>3</sub>, OCH<sub>3</sub>), 51.09 (CH, C-3), 39.09 (C,  $\text{OCOC}(\text{CH}_3)_3$ ), 27.20 (CH<sub>3</sub>,  $\text{OCOC}(\text{CH}_3)_3$ ); HRFABMS ( $m/z$ ) calcd. for  $\text{C}_{23}\text{H}_{26}\text{O}_5\text{Na}$  405.1678 [ $\text{M}+\text{Na}$ ]<sup>+</sup>, found 405.1676.

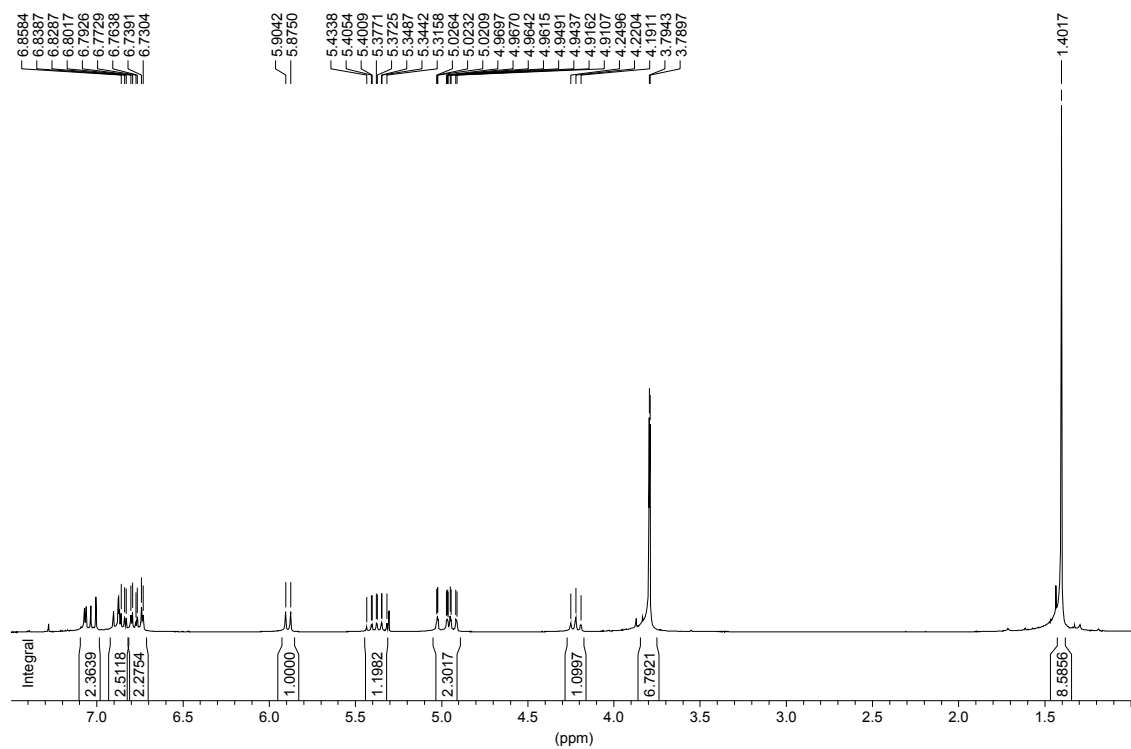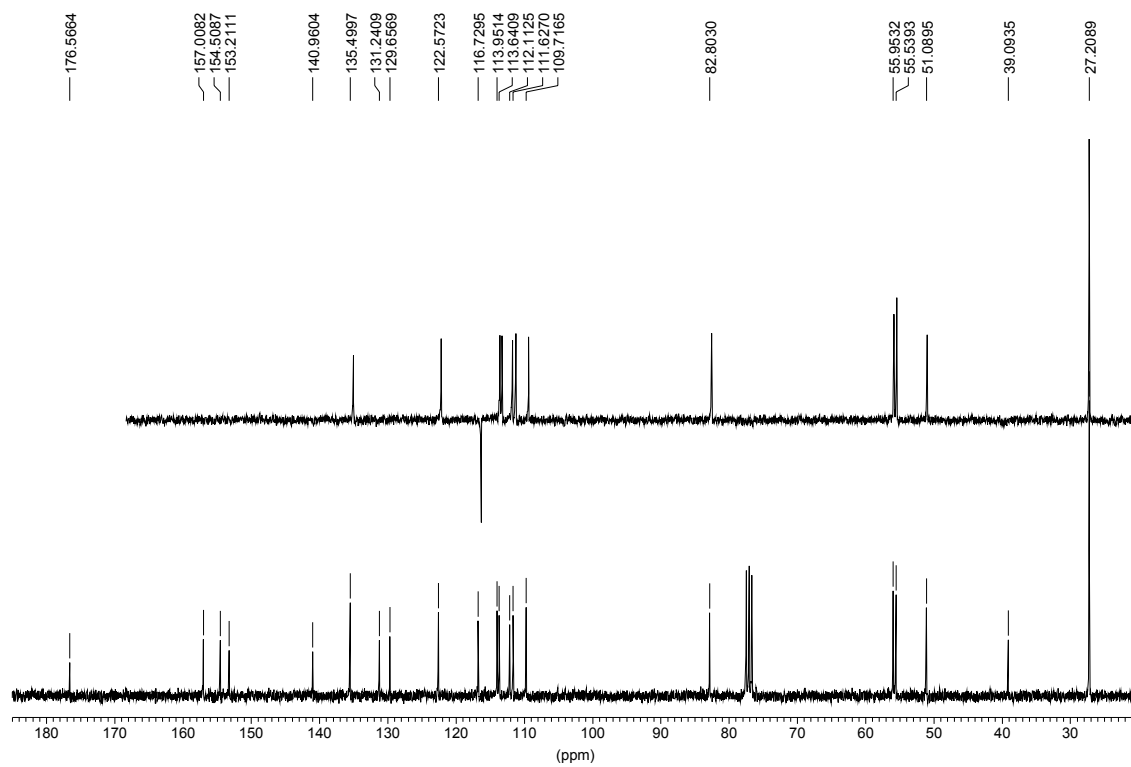

**5-Methoxy-2-(5-methoxy-2-pivaloyloxyphenyl)-3-formyl-2,3-dihydrobenzofuran (12).**

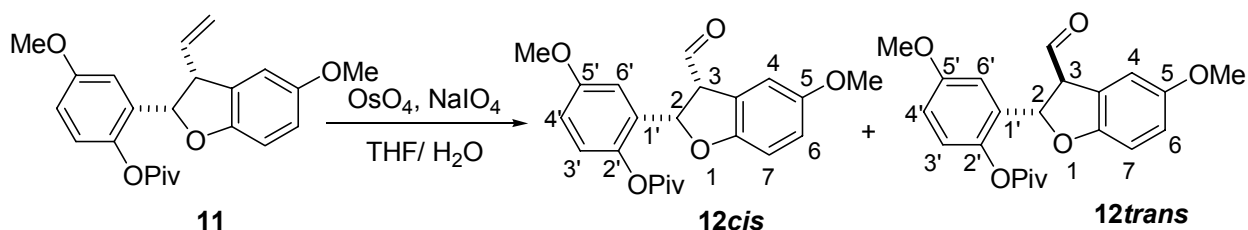

Compound **11** (187 mg, 0.49 mmol) was dissolved in THF/ $\text{H}_2\text{O}$  3:2 (4mL) and cooled at  $0^\circ\text{C}$ . The flask was protected from the light.  $\text{OsO}_4$  (196  $\mu\text{L}$ , 0.012 mmol, 2.5% in isopropanol) and  $\text{NaIO}_4$  (419 mg, 1.96 mmol) were added. The mixture was stirred at  $0^\circ\text{C}$  for 5 h, then water was added and was extracted with  $\text{Et}_2\text{O}$ . The dried ( $\text{Na}_2\text{SO}_4$ ) extract was concentrated *in vacuo* and purified by chromatography over silica gel, eluting with hexane/ $\text{Et}_2\text{O}$  85:15, to give compound **12cis** (124 mg, 0.32 mmol, 65%) and **12trans** (20 mg, 0.05 mmol, 11%) as colourless oils:

Compound **12cis**: IR (film)  $\nu_{\text{max}}$  2967, 2937, 2835, 1749, 1672, 1489, 1432, 1274, 1198, 1108, 1031, 805  $\text{cm}^{-1}$ ;  $^1\text{H}$  NMR ( $\text{CDCl}_3$ , 300 MHz)  $\delta$  9.18 (1H, d,  $J=3.7$  Hz, CHO), 7.14 (1H, d,  $J=2.9$  Hz, H-6'), 7.03 (1H, d,  $J=8.9$  Hz, H-3'), 6.94 (1H, d,  $J=8.9$  Hz, H-7), 6.87 (1H, dd,  $J=8.9$ ,  $J=2.9$  Hz, H-4'), 6.84 (1H, dd,  $J=8.7$ ,  $J=2.5$  Hz, H-6), 6.75 (1H, d,  $J=2.5$  Hz, H-4), 6.02 (1H, d,  $J=9.4$  Hz, H-2), 4.29 (1H, dd,  $J=9.4$ ,  $J=3.7$  Hz, H-3), 3.79 (3H, s,  $\text{OCH}_3$ ), 3.77 (3H, s,  $\text{OCH}_3'$ ), 1.39 (9H, s,  $\text{OCOC}(\text{CH}_3)_3$ ).  $^{13}\text{C}$  NMR ( $\text{CDCl}_3$ , 75 MHz)  $\delta$  196.99 (CH, CHO), 176.80 (C,  $\text{OCOC}(\text{CH}_3)_3$ ), 157.49 (C, C-5'), 154.83 (C, C-5), 154.10 (C, C-7a), 140.55 (C, C-2'), 129.66 (C, C-1'), 123.34 (CH, C-3'), 123.03 (C, C-3a), 115.75 (CH, C-6), 114.54 (CH, C-4'), 111.83 (CH, C-6'), 111.47 (CH, C-4), 110.30 (CH, C-7), 80.60 (CH, C-2), 57.99 (CH, C-3), 55.97 (CH<sub>3</sub>,  $\text{OCH}_3$ ), 55.60 (CH<sub>3</sub>,  $\text{OCH}_3'$ ), 39.11 (C,  $\text{OCOC}(\text{CH}_3)_3$ ), 27.13 (CH<sub>3</sub>,  $\text{OCOC}(\text{CH}_3)_3$ ); HRFABMS ( $m/z$ ) calcd. for  $\text{C}_{22}\text{H}_{24}\text{O}_6\text{Na}$  407.1470 [ $\text{M}+\text{Na}$ ]<sup>+</sup>, found 407.1477.

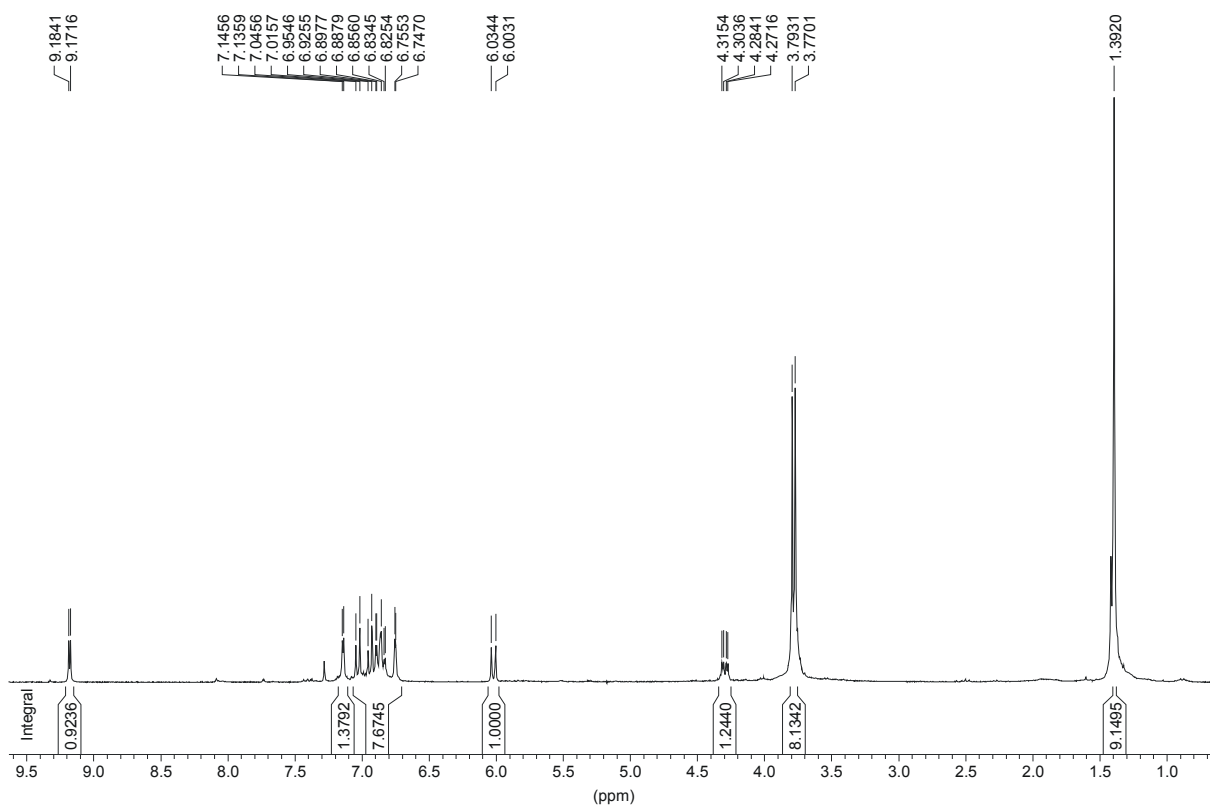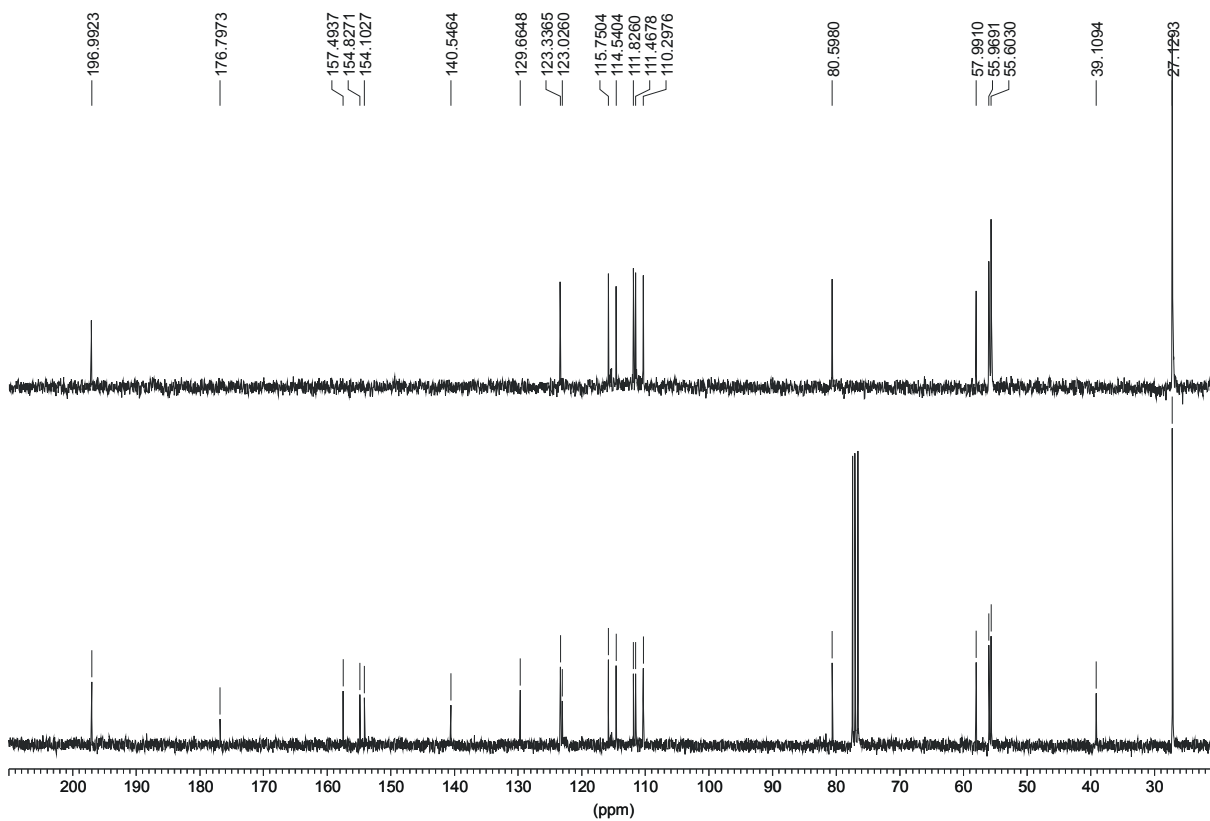

Compound **12trans**: IR (film)  $\nu_{\max}$  2964, 2935, 2835, 1747, 1608, 1488, 1430, 1274, 1206, 1115, 1033, 803 cm<sup>-1</sup>, <sup>1</sup>H NMR (CDCl<sub>3</sub>, 300 MHz)  $\delta$  9.76 (1H, d,  $J$  = 1.5 Hz, CHO), 6.93-

6.82 (6H, m, H-4, H-6, H-7, H-3', H-4', H-6'), 6.22 (1H, d,  $J=4.8$  Hz, H-2), 4.17 (1H, d,  $J=4.8$  Hz, H-3), 3.79 (3H, s, OCH<sub>3</sub>), 3.74 (3H, s, OCH<sub>3</sub>'), 1.35 (9H, s, OCOC(CH<sub>3</sub>)<sub>3</sub>); <sup>13</sup>C NMR (CDCl<sub>3</sub>, 75 MHz)  $\delta$  195.32 (CH, CHO), 177.52 (C, OCOC(CH<sub>3</sub>)<sub>3</sub>), 157.44 (C, C-5'), 154.74 (C, C-5), 153.71 (C, C-7a), 140.89 (C, C-2'), 133.77 (C, C-1'), 123.18 (CH, C-3'), 121.94 (C, C-3a), 115.38 (CH, C-6), 114.16 (CH, C-4'), 111.76 (CH, C-6'), 111.00 (CH, C-4), 110.22 (CH, C-7), 76.96 (CH, C-2), 62.61 (CH, C-3), 56.02 (CH<sub>3</sub>, OCH<sub>3</sub>), 55.51 (CH<sub>3</sub>, OCH<sub>3</sub>), 39.18 (C, OCOC(CH<sub>3</sub>)<sub>3</sub>), 27.05 (CH<sub>3</sub>, OCOC(CH<sub>3</sub>)<sub>3</sub>); HRFABMS ( $m/z$ ) calcd. for C<sub>22</sub>H<sub>24</sub>O<sub>6</sub>Na 407.1470 [M+Na]<sup>+</sup>, found 407.1472.

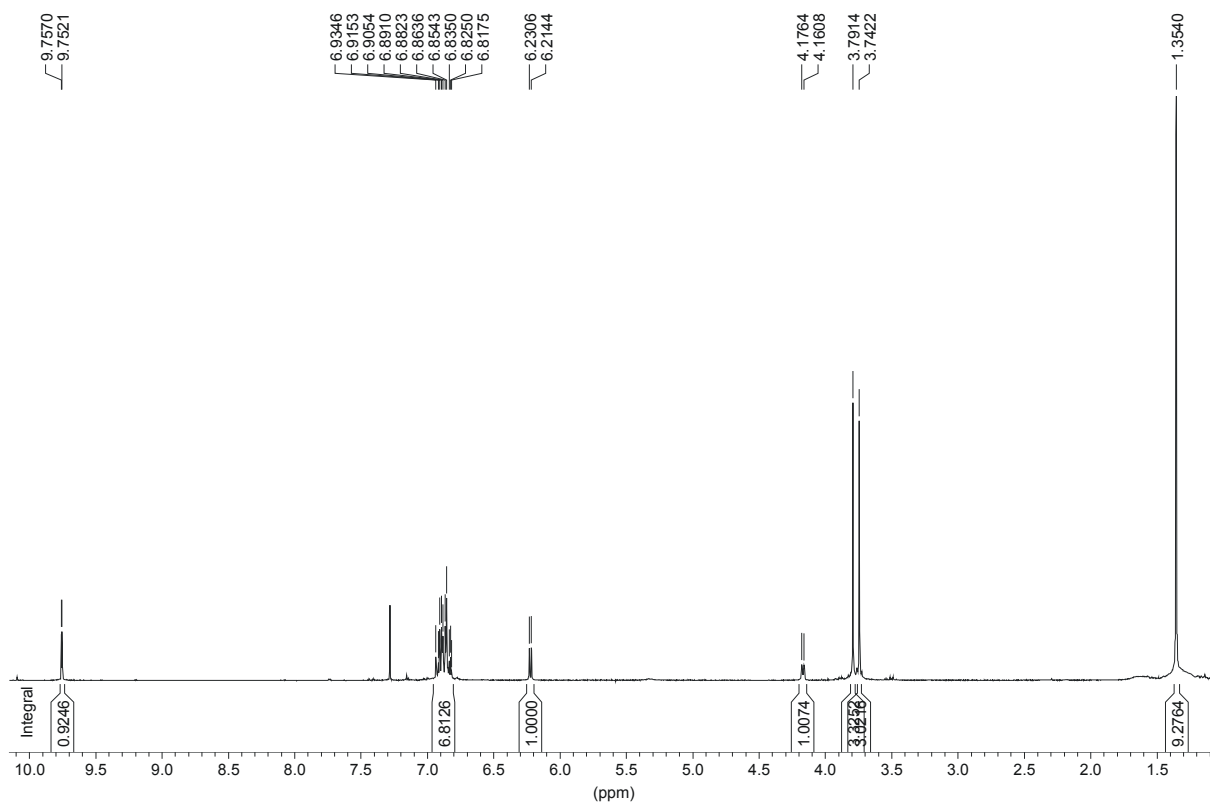

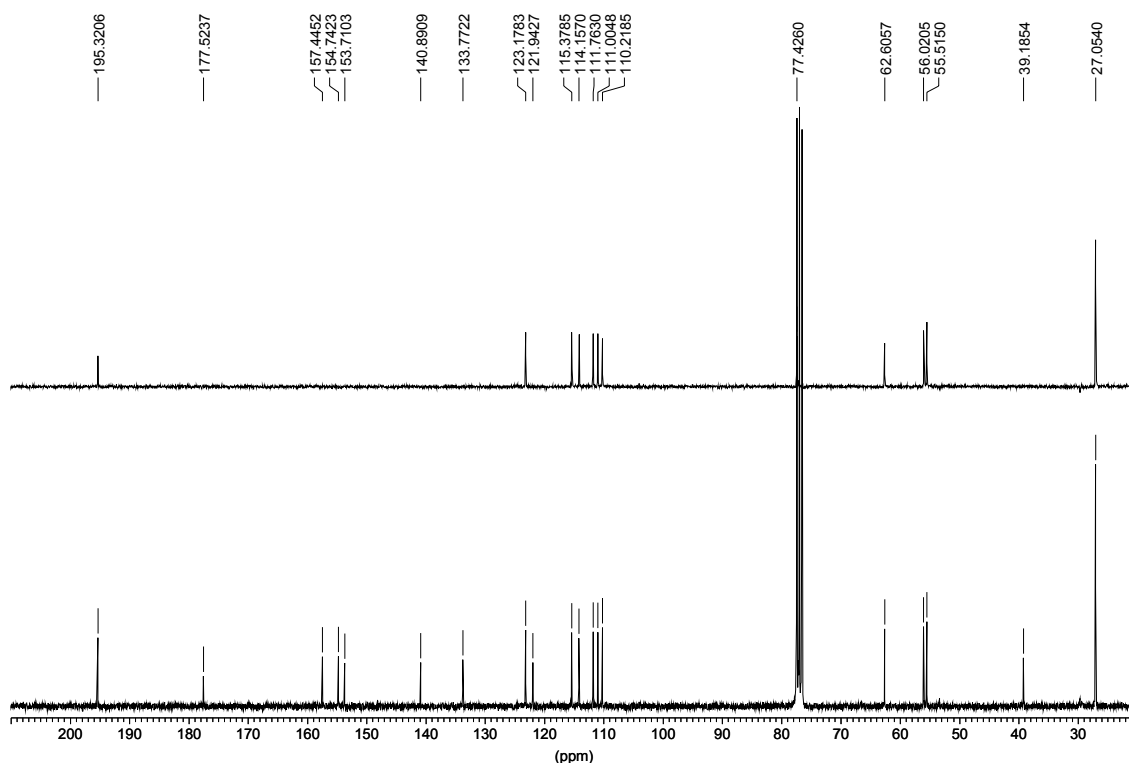

**(2*S*\*,3*R*\*)-3-Hydroxymethyl-5-methoxy-2-(5-methoxy-2-hydroxyphenyl)-2,3-dihydro-benzofuran (13*cis*).**

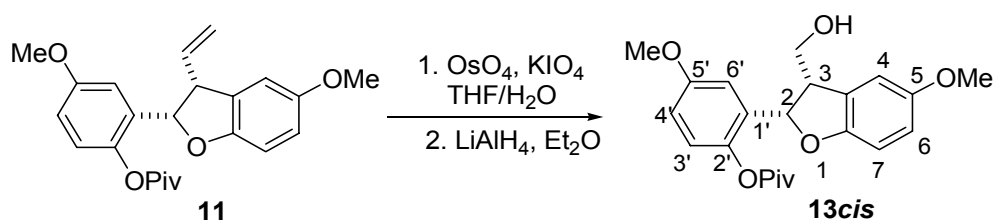

Compound **11** (187 mg, 0.49 mmol) was dissolved in THF/H<sub>2</sub>O 3:2 (4mL) and cooled at 0°C. The flask was protected from the light. OsO<sub>4</sub> (196 μL, 0.012 mmol, 2.5% in isopropanol) and NaIO<sub>4</sub> (419 mg, 1.96 mmol) were added. The mixture was stirred at 0°C for 5 h, then water was added and extracted with Et<sub>2</sub>O. The dried (Na<sub>2</sub>SO<sub>4</sub>) extract was concentrated *in vacuo*. The residue was dissolved in anhydrous Et<sub>2</sub>O (4 mL), and added to a solution of LiAlH<sub>4</sub> (56 mg, 1.47 mmol) in Et<sub>2</sub>O (4 mL). The reaction mixture was stirred at r.t. for 30 minutes. Then, a saturated solution of NH<sub>4</sub>Cl/H<sub>2</sub>O (6 mL) was added, and the solution was extracted with CH<sub>2</sub>Cl<sub>2</sub>. The organic layer was dried over anhyd. Na<sub>2</sub>SO<sub>4</sub>, and the solvent removed *in vacuo*. Flash chromatography of the residue (hexane: Et<sub>2</sub>O 4:6) afforded **13cis** (100 mg, 0.33 mmol, 68%) as a solid foam: IR (film)  $\nu_{\max}$  3375, 2997, 2942, 2833, 1605, 1486, 1431, 1353, 1271, 1204, 1032, 972, 870, 807, 737 cm<sup>-1</sup>; <sup>1</sup>H NMR

(CDCl<sub>3</sub>, 500 MHz)  $\delta$  6.89 (1H, d,  $J$  = 8.5 Hz, H-3'), 6.88 (1H, d,  $J$  = 2.6 Hz, H-6'), 6.86 (1H, d,  $J$  = 2.8 Hz, H-4), 6.80 (1H, d,  $J$  = 8.6 Hz, H-7), 6.78 (1H, dd,  $J$  = 8.6,  $J$  = 2.8 Hz, H-6), 6.77 (1H, dd,  $J$  = 8.6,  $J$  = 2.6 Hz, H-4'), 6.02 (1H, d,  $J$  = 8.5 Hz, H-2), 3.85 (1H, m, H-3), 3.80 (3H, s, OCH<sub>3</sub>), 3.76 (3H, s, OCH<sub>3</sub>), 3.58 (1H, dd,  $J$  = 11.3,  $J$  = 5.3 Hz, H-1''), 3.53 (1H, dd,  $J$  = 11.3,  $J$  = 7.1 Hz, H-1'''), <sup>13</sup>C NMR (CDCl<sub>3</sub>, 75 MHz)  $\delta$  154.57 (C, C-5'), 153.71 (C, C-7a), 153.04 (C, C-5), 146.90 (C, C-2'), 128.75 (C, C-1'), 124.59 (C, C-3a), 117.41 (CH, C-7), 114.24 (CH, C-4'), 113.78 (CH, C-6), 112.56 (CH, C-6'), 111.46 (CH, C-4), 109.86 (CH, C-3'), 84.13 (CH, C-2), 62.92 (CH<sub>2</sub>, C-1''), 56.00 (CH<sub>3</sub>, OCH<sub>3</sub>), 55.71 (CH<sub>3</sub>, OCH<sub>3</sub>), 48.85 (CH, C-3). HRFABMS ( $m/z$ ) calcd. for C<sub>17</sub>H<sub>18</sub>O<sub>5</sub>Na 325.1051 [M+Na]<sup>+</sup>, found 325.1052.

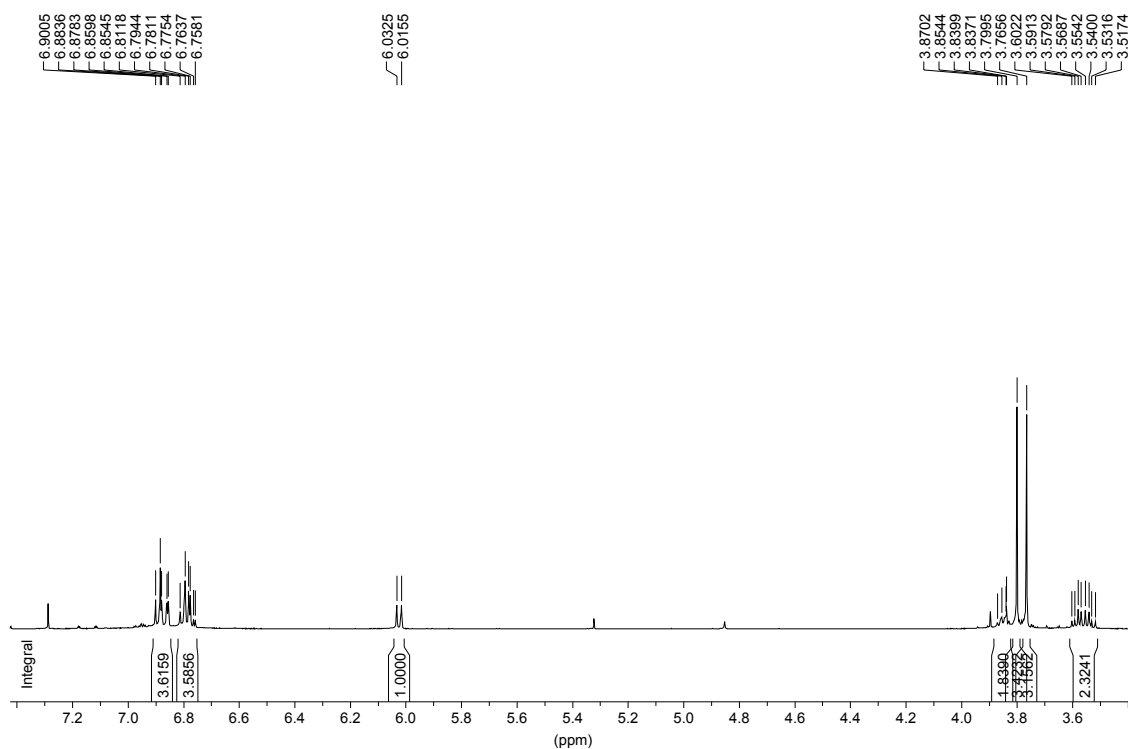



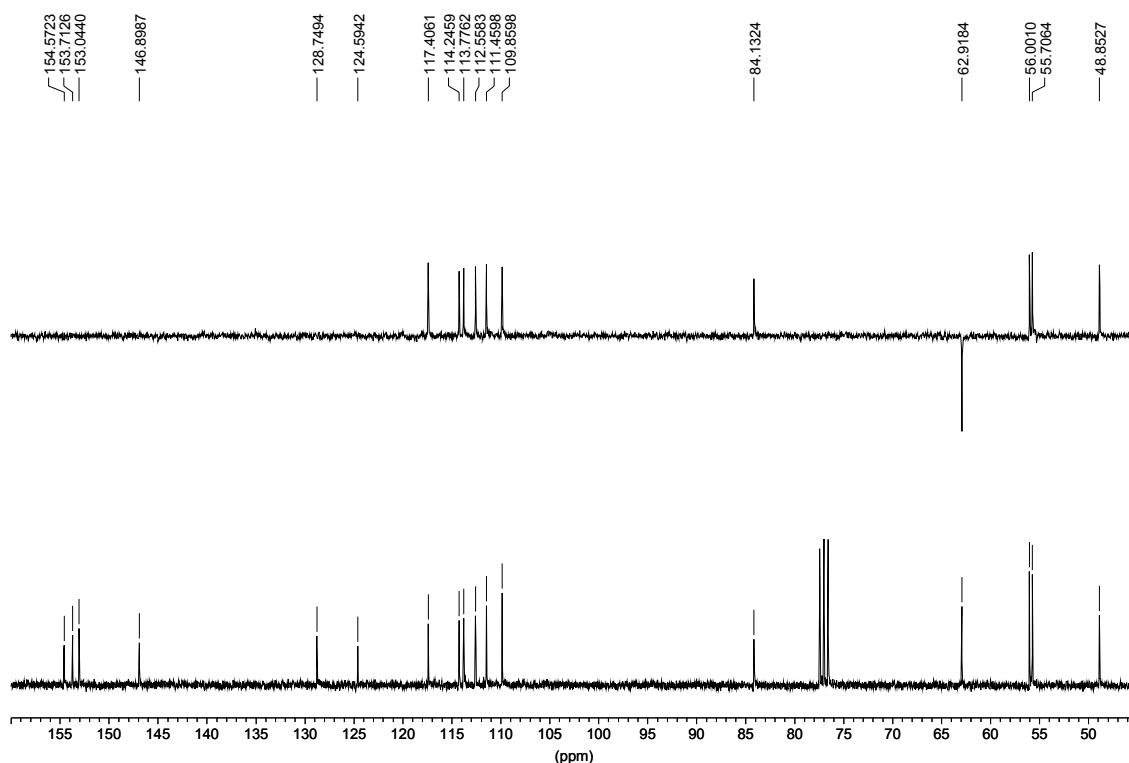

**(2*S*\*,3*S*\*)-3-Hydroxymethyl-5-methoxy-2-(5-methoxy-2-hydroxyphenyl)-2,3-dihydro-benzofuran (**13trans**).**

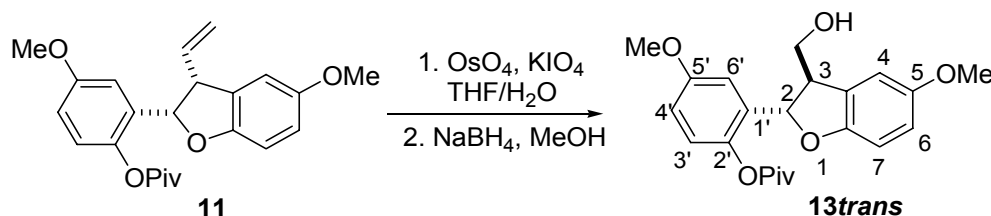

Compound **11** (449 mg, 1.18 mmol) was dissolved in THF/H<sub>2</sub>O 3:2 (12 mL) and cooled at 0°C. The flask was protected from the light. OsO<sub>4</sub> (474 μL, 0.029 mmol, 2.5% in isopropanol) and NaIO<sub>4</sub> (1 g, 4.71 mmol) were added. The mixture was stirred at 0°C for 5 h, then water was added and extracted with Et<sub>2</sub>O. The dried (Na<sub>2</sub>SO<sub>4</sub>) extract was concentrated *in vacuo*. The residue was dissolved in MeOH (10 mL) and the solution was cooled at 0°C, then NaBH<sub>4</sub> (238 mg, 6.28 mmol) was added slowly. The mixture was allowed to warm to room temperature, and was stirred for 12 h. Then, a saturated solution of NH<sub>4</sub>Cl/H<sub>2</sub>O was added, and the solution was extracted with Et<sub>2</sub>O. The organic layer was dried over anhyd. Na<sub>2</sub>SO<sub>4</sub>, and the solvent removed *in vacuo*. Flash chromatography of the residue (hexane:Et<sub>2</sub>O 4:6) gave **13trans** (251 mg, 0.83 mmol, 70%) as a solid foam: IR (film)  $\nu_{\text{max}}$  3395, 2988, 2924, 2850, 1500, 1432, 1269, 1204, 1152, 1032, 986, 912, 743 cm<sup>-1</sup>; <sup>1</sup>H NMR (CDCl<sub>3</sub>, 300 MHz)  $\delta$  6.90 (1H, d, *J* = 8.6 Hz, H-3'), 6.89 (1H, d, *J* = 3.0 Hz, H-4), 6.86 (1H, d, *J* = 8.8 Hz, H-7), 6.78 (1H, dd, *J* = 8.6, *J* = 2.6 Hz, H-4'), 6.75 (1H,

dd,  $J = 8.8, J = 3.0$  Hz, H-6), 6.72 (1H, d,  $J = 2.6$  Hz, H-6'), 5.86 (1H, d,  $J = 5.4$  Hz, H-2), 4.10 (1H, dd,  $J = 10.1, J = 4.5$  Hz, H-1''b), 3.94 (1H, t,  $J = 10.1$  Hz, H-1''a), 3.78 (3H, s, OCH<sub>3</sub>), 3.74 (3H, s, OCH<sub>3</sub>), 3.58 (1H, ddd,  $J = 10.1, J = 5.4, J = 4.5$  Hz, H-3); <sup>13</sup>C NMR (CDCl<sub>3</sub>, 75 MHz)  $\delta$  154.54 (C, C-5'), 153.69\* (C, C-7a), 153.55\* (C, C-5), 146.18 (C, C-2'), 128.77 (C, C-1'), 126.24 (C, C-3a), 117.90 (CH, C-7), 114.18 (CH, C-4'), 113.95 (CH, C-6), 111.05 (CH, C-6'), 110.84 (CH, C-4), 109.84 (CH, C-3'), 83.62 (CH, C-2), 65.40 (CH<sub>2</sub>, C-1''), 56.02 (CH<sub>3</sub>, OCH<sub>3</sub>), 55.70 (CH<sub>3</sub>, OCH<sub>3</sub>), 53.42 (CH, C-3). (\*) may be interchanged; HRFABMS ( $m/z$ ) calcd. for C<sub>17</sub>H<sub>18</sub>O<sub>5</sub>Na 325.1052 [M+Na]<sup>+</sup>, found 325.1051.

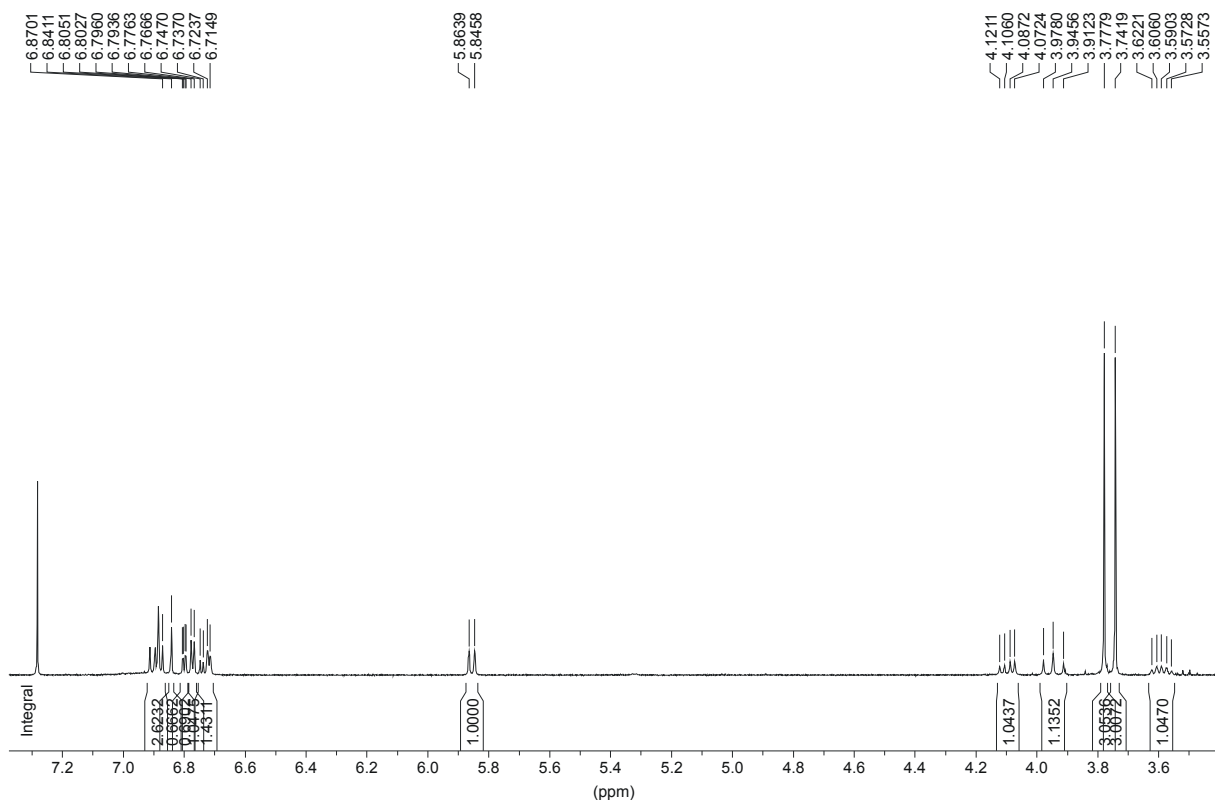

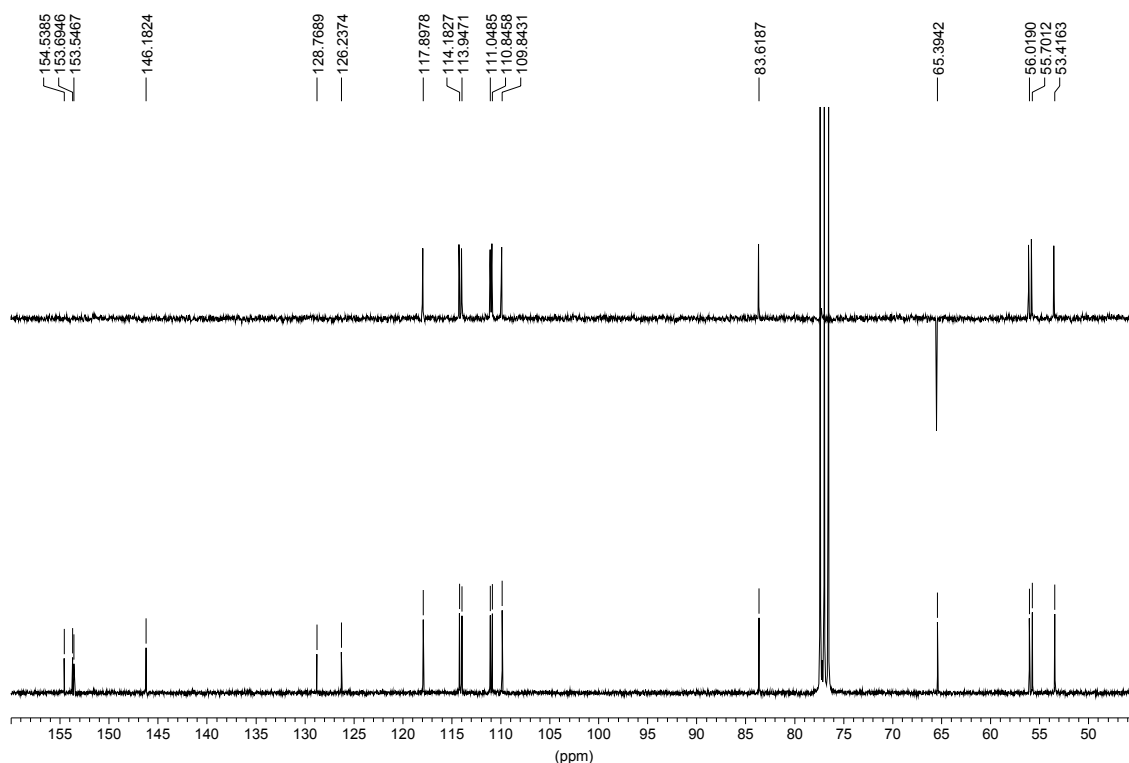

(±)-(*cis*)-2,8-dimethoxypterocarpan (**14cis**)

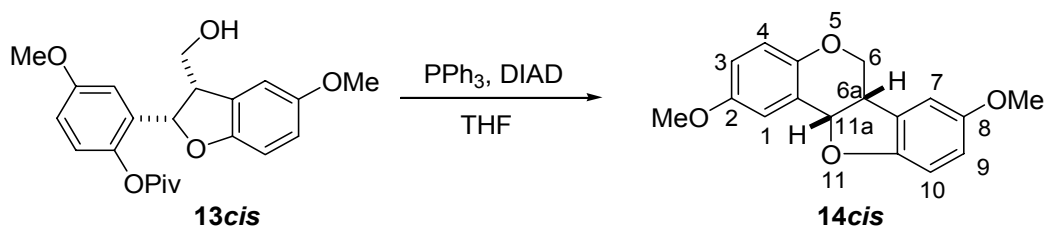

To a solution of **13cis** (35 mg, 0.11 mmol) in anhyd. THF (1 mL), PPh<sub>3</sub> (62 mg, 0.22 mmol) and DIAD (0.045 ml, 0.23 mmol), were added. After 30 min., the solvent was removed *in vacuo*. Flash chromatography (hexane:Et<sub>2</sub>O 9:1) of the residue afforded **14cis** (24 mg, 0.08 mmol, 72%), as a white solid: m.p. 115-117°C (hexane-Et<sub>2</sub>O), IR (film)  $\nu_{\max}$  2994, 2947, 2831, 1500, 1429, 1258, 1216, 1197, 1028, 865, 832, 805 cm<sup>-1</sup>; <sup>1</sup>H NMR (CDCl<sub>3</sub>, 500 MHz)  $\delta$  7.07 (1H, d, *J* = 2.7 Hz, H-1), 6.90 (2H, m, H-3 y H-4), 6.87 (1H, d, *J* = 2.7 Hz, H-7), 6.80 (1H, d, *J* = 8.6 Hz, H-10), 6.75 (1H, dd, *J* = 8.6, *J* = 2.7 Hz, H-9), 5.52 (1H, d, *J* = 6.6 Hz, H-11a), 4.29 (1H, dd, *J* = 10.5, *J* = 4.3 Hz, H-6), 3.83 (3H, s, OCH<sub>3</sub>), 3.80 (3H, s, OCH<sub>3</sub>), 3.68 (1H, t, *J* = 10.5 Hz, H-6'), 3.64 (1H, ddd, *J* = 10.8, *J* = 6.6, *J* = 4.3 Hz, H-6a); gNOESY-2D, NOEs observed: 3.64 (5.52); <sup>13</sup>C NMR (CDCl<sub>3</sub>, 75 MHz)  $\delta$  154.37 (C, C-2\*), 154.25 (C, C-8\*), 153.16 (C, C-10a), 149.34 (C, C-4a), 127.93 (C, C-

6b), 120.38 (C, C-11b), 118.27 (CH, C-4), 117.33 (CH, C-3), 113.87 (C, C-1\*), 113.85 (CH, C-9\*), 111.05 (CH, C-7), 110.05 (CH, C-10), 77.98 (CH, C-11a), 66.41 (CH<sub>2</sub>, C-6), 55.96 (CH<sub>3</sub>, OCH<sub>3</sub>), 55.75 (CH<sub>3</sub>, OCH<sub>3</sub>), 40.89 (CH, C-6a). (\*) may be interchanged; HRFABMS (*m/z*) calcd. for C<sub>17</sub>H<sub>16</sub>O<sub>4</sub> 284.1048 [M]<sup>+</sup>, found 284.1050.

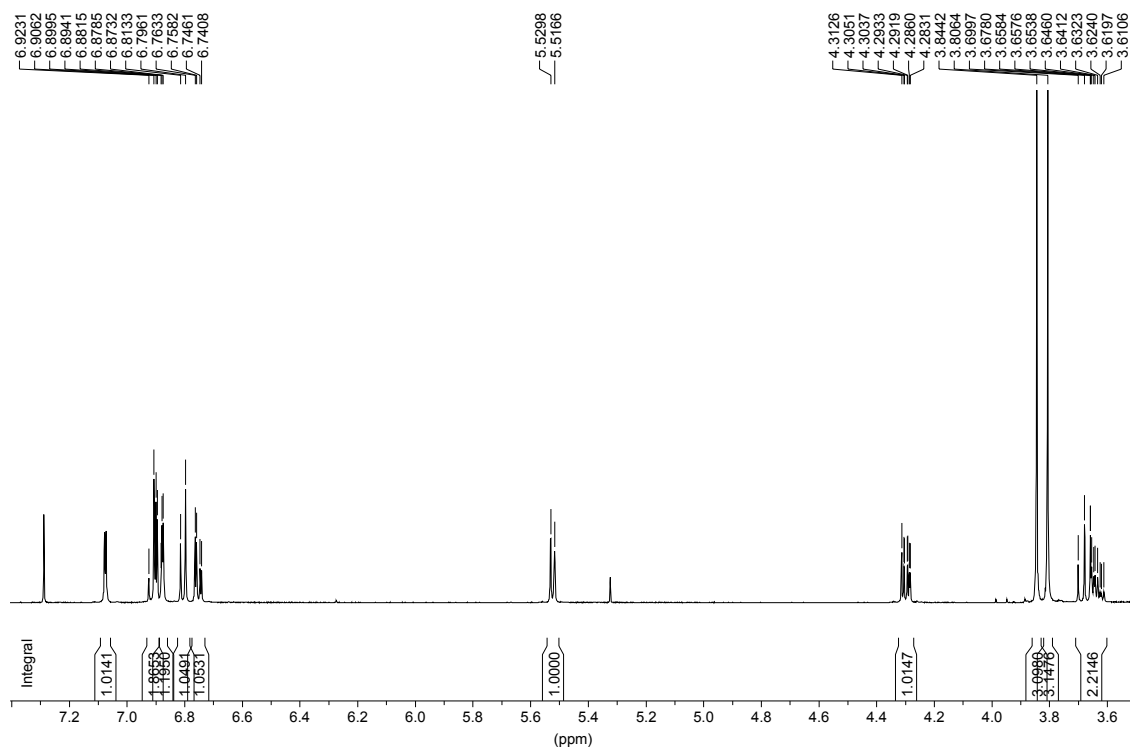

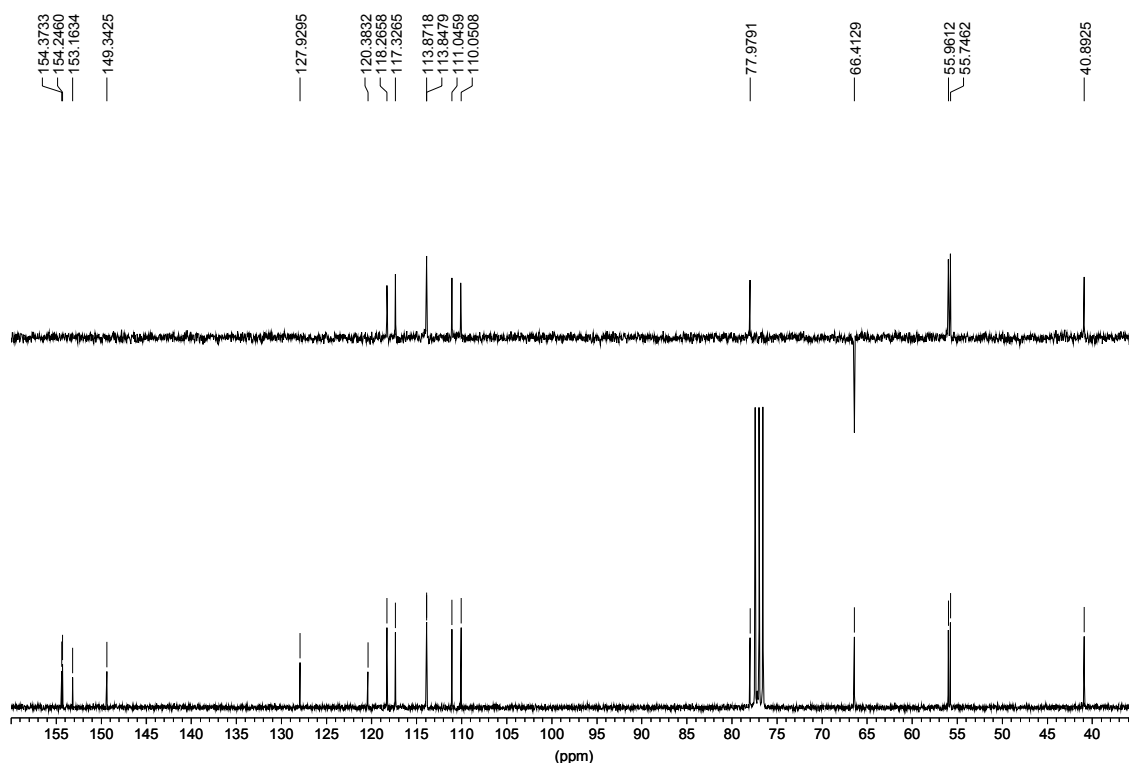

(±)-(*trans*)-2,8-dimethoxytercarpan (**14trans**)

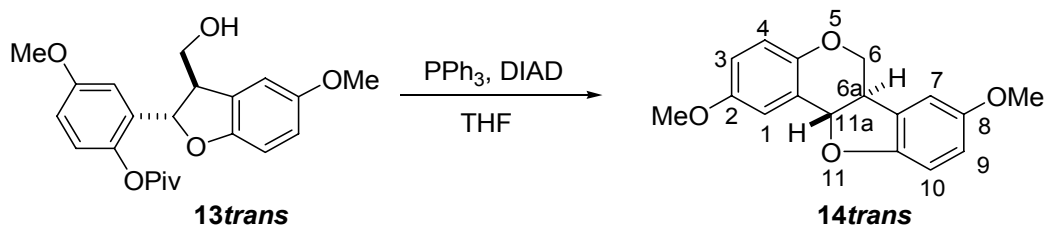

To a solution of **13trans** (10 mg, 0.03 mmol) in anhyd. THF (1 mL), PPh<sub>3</sub> (17 mg, 0.06 mmol) and DIAD (0.013 ml, 0.06 mmol), were added. After 30 min., the solvent was removed *in vacuo*. Flash chromatography (hexane:Et<sub>2</sub>O 9:1) of the residue afforded **14trans** (6 mg, 0.02 mmol, 68%), as a white solid: m.p. 118-120°C (hexane-Et<sub>2</sub>O), IR (film)  $\nu_{\max}$  2956, 2924, 2852, 2832, 1743, 1487, 1471, 1432, 1369, 1274, 1200, 1039 cm<sup>-1</sup>; <sup>1</sup>H NMR (CDCl<sub>3</sub>, 500 MHz)  $\delta$  7.00 (1H, d, *J* = 2.7 Hz, H-7), 6.96 (1H, dd, *J* = 7.8, *J* = 2.7 Hz, H-9), 6.83-6.75 (4H, m, H-1, 3, 4, 10), 5.19 (1H, d, *J* = 13.4 Hz, H-11a), 4.88 (1H, dd, *J* = 9.9, *J* = 4.7 Hz, H-6), 4.47 (1H, dd, *J* = 11.9, *J* = 9.9 Hz, H-6'), 3.82 (3H, s, OCH<sub>3</sub>), 3.80 (3H, s, OCH<sub>3</sub>), 3.63 (1H, ddd, *J* = 13.4, *J* = 11.9, *J* = 4.7 Hz, H-6a); gNOESY-2D, NOEs observed: 3.63 (4.47, 4.88); <sup>13</sup>C NMR (CDCl<sub>3</sub>, 75 MHz)  $\delta$  155.33 (C, C-2\*), 154.83 (C, C-8\*), 153.45 (C, C-10a), 146.51 (C, C-4a), 128.47 (C, C-6b), 124.96 (C, C-11b), 116.99 (CH, C-4), 115.07 (CH, C-3), 113.03 (CH, C-1), 111.04 (CH, C-9), 110.04 (CH, C-10), 107.85 (CH, C-7), 83.99 (CH, C-11a), 68.33 (CH<sub>2</sub>, C-6), 55.95 (CH<sub>3</sub>, OCH<sub>3</sub>), 55.81 (CH<sub>3</sub>,

OCH<sub>3</sub>), 45.61 (CH, C-6a). (\*) may be interchanged; HRFABMS (*m/z*) calcd. for C<sub>17</sub>H<sub>16</sub>O<sub>4</sub>Na 307.0950 [M+Na]<sup>+</sup>, found 307.0950.

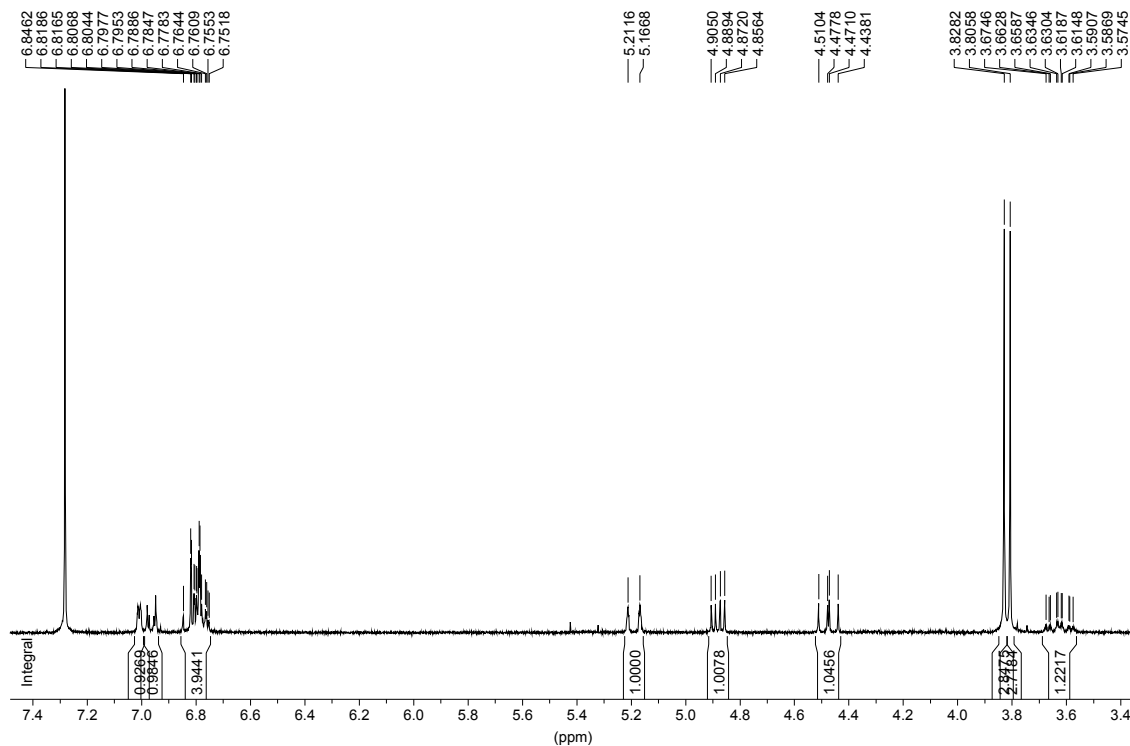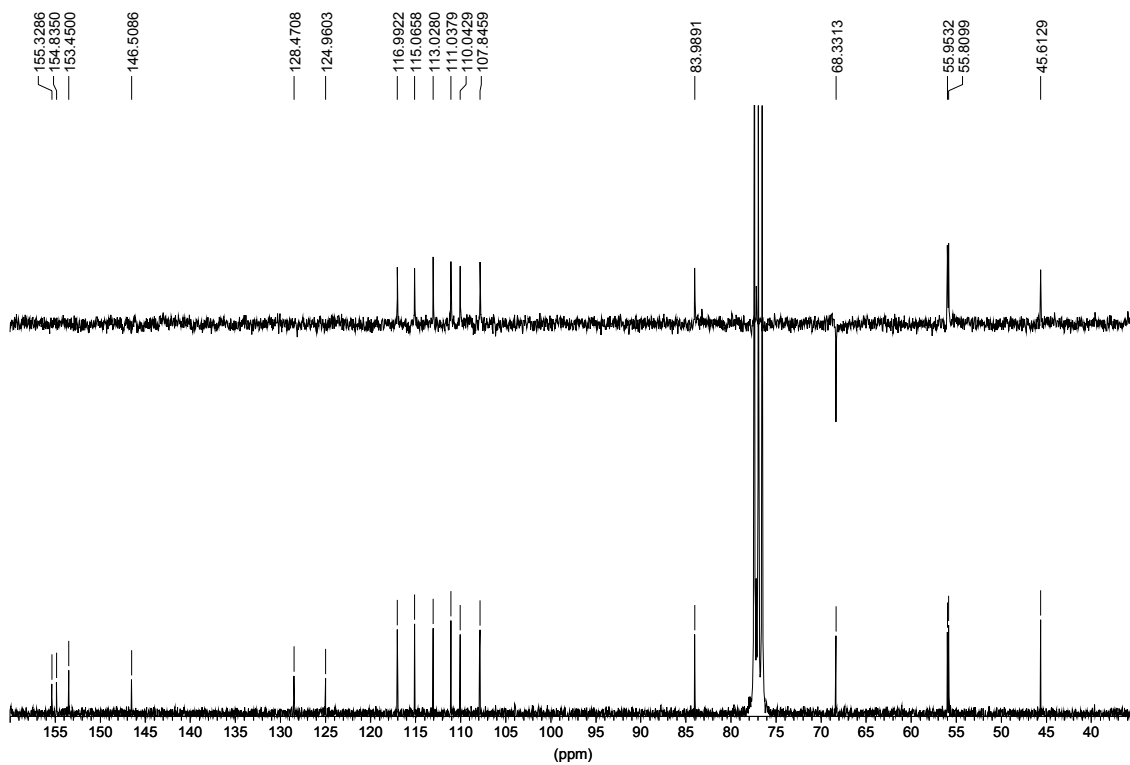

**Data for the X-ray structure analysis of 14cis:** Crystal from Hexane/Et<sub>2</sub>O: crystal dimensions 0.410 x 0.110 x 0.055mm; C<sub>17</sub>H<sub>16</sub>O<sub>4</sub> (M= 284.30); triclinic, space group P1, a= 4.7090(7), b= 8.2955(12), c= 9.1628(13)Å, α= 92.006(2)°, β= 94.865(2)°, γ= 104.989(3)°, V= 343.90(9)Å<sup>3</sup>, Z= 1, Dx= 1,373Mg/m<sup>3</sup>, μ(Mo+ Kα)= 0.098mm<sup>-1</sup>. λ= 0.71073Å ( MoKα radiation, SMART APEX CCD single crystal diffractometer). Data collection at 273(2) K, φ and ω scans, 5.093<θ<46.474°. 1581 unique reflections of which 1206 were observed with I>2σ(I). Crystal structure and anisotropic least-squares refinement were carried out with SHELXL-97. The final cycle of full-matrix least-squares refinement based on 1206 reflections and 192 parameters converged to a final value of R1 (F<sup>2</sup>>2σ(F<sup>2</sup>)) = 0.030, wR2 (F<sup>2</sup>>2σ(F<sup>2</sup>)) = 0.0696. Residual electron density 0.09/-0.109eÅ<sup>-3</sup>. Crystallographic data have been deposited with the Cambridge Structural Data Centre as supplementary publication number CCDC 260556.

|                                   |                                               |                     |
|-----------------------------------|-----------------------------------------------|---------------------|
| Identification code               | <b>14cis</b>                                  |                     |
| Empirical formula                 | C17 H16 O4                                    |                     |
| Formula weight                    | 284.30                                        |                     |
| Temperature                       | 273(2) K                                      |                     |
| Wavelength                        | 0.71073 Å                                     |                     |
| Crystal system, space group       | Triclinic, P1                                 |                     |
| Unit cell dimensions              | a = 4.7090(7) Å                               | alpha = 92.006(2)°  |
|                                   | b = 8.2955(12) Å                              | beta = 94.865(2)°   |
|                                   | c = 9.1628(13) Å                              | gamma = 104.989(3)° |
| Volume                            | 343.90(9) Å <sup>3</sup>                      |                     |
| Z, Calculated density             | 1, 1,373 Mg/m <sup>3</sup>                    |                     |
| Absorption coefficient            | 0.098 mm <sup>-1</sup>                        |                     |
| F (000)                           | 150                                           |                     |
| Crystal size                      | 0.410 x 0.110 x 0.055 mm                      |                     |
| Theta range for data collection   | 5.093 to 46.474°                              |                     |
| Limiting indices                  | -5<=h<=5, -9<=k<=5, -10<=l<=10                |                     |
| Reflections collected / unique    | 1581 / 1206 [R (int) = 0.0195]                |                     |
| Refinement method                 | Full – matrix least-squares on F <sup>2</sup> |                     |
| Data / restraints / parameters    | 1206/ 3 / 192                                 |                     |
| Goodness-of-fit on F <sup>2</sup> | 1.006                                         |                     |
| Final R indices [I>2sigma (I)]    | R1 = 0.0300, wR2 = 0.0696                     |                     |
| R indices (all data)              | R1 = 0.0321, wR2 = 0.0697                     |                     |
| Largest diff. Peak and hole       | 0.09 and -0.109 e.Å <sup>-3</sup>             |                     |

Atomic coordinates ( $\times 10^4$ ) and equivalent isotropic displacement parameters ( $\text{\AA}^2 \times 10^3$ ) for **14cis**. U (eq) is defined as one third of the trace of the orthogonalized  $U_{ij}$  tensor.

|     | x        | y        | z        | U(eq)   |
|-----|----------|----------|----------|---------|
| O1  | 2457(1)  | 9774(1)  | 10244(1) | 73.6(1) |
| O2  | 3859(1)  | 10024(1) | 4341(2)  | 50.1(1) |
| O3  | 3283(1)  | 5744(1)  | 6107(2)  | 55.5(1) |
| O4  | -2764(1) | 4268(1)  | 635(1)   | 77.9(1) |
| C1  | 2817(1)  | 9921(1)  | 8779(1)  | 51.5(1) |
| C2  | 2136(1)  | 11158(1) | 7954(1)  | 57.2(1) |
| C3  | 2602(1)  | 11176(1) | 6486(1)  | 50.9(1) |
| C4  | 3661(1)  | 9967(1)  | 5832(1)  | 41.1(1) |
| C5  | 4369(1)  | 8719(1)  | 6635(1)  | 42.3(1) |
| C6  | 3952(1)  | 8733(1)  | 8119(1)  | 49.7(1) |
| C7  | 2783(1)  | 6267(1)  | 3665(1)  | 43.8(1) |
| C8  | 1407(1)  | 5974(1)  | 2246(1)  | 50.8(1) |
| C9  | -1187(1) | 4693(1)  | 1989(1)  | 53.6(1) |
| C10 | -2353(1) | 3759(1)  | 3124(1)  | 58.3(1) |
| C11 | -972(1)  | 4065(1)  | 4527(1)  | 53.2(1) |
| C12 | 1598(1)  | 5322(1)  | 4770(1)  | 45.6(1) |
| C20 | 960(1)   | 10841(1) | 10904(1) | 78.2(1) |
| C21 | 6010(1)  | 9258(1)  | 3825(1)  | 48.4(1) |
| C22 | 5617(1)  | 7495(1)  | 4281(1)  | 47.6(1) |
| C23 | -1612(1) | 5114(1)  | -583(1)  | 89.3(1) |
| C24 | 5429(1)  | 7347(1)  | 5943(1)  | 46.2(1) |

Bond lengths [ $\text{\AA}$ ] and angles [ $^\circ$ ] for **14cis**.

|                |          |
|----------------|----------|
| O(1) – C(1)    | 1.373(3) |
| O(1) – C(20)   | 1.416(4) |
| C(21) – O(2)   | 1.430(3) |
| C(21) – C(22)  | 1.505(4) |
| C(21) – H(21A) | 0.9700   |
| C(21) – H(21B) | 0.9700   |
| O(3) – C(12)   | 1.383(3) |
| O(3) – C(24)   | 1.469(3) |
| O(4) – C(9)    | 1.375(3) |
| O(4) – C(23)   | 1.412(4) |
| C(1) – C(6)    | 1.381(4) |
| C(1) – C(2)    | 1.382(4) |
| C(2) – C(3)    | 1.381(4) |



|                         |            |
|-------------------------|------------|
| C(2) – H(2)             | 0.9300     |
| C(3) – C(4)             | 1.371(3)   |
| C(3) – H(3)             | 0.9300     |
| C(4) – O(2)             | 1.379(3)   |
| C(4) – C(5)             | 1.383(3)   |
| C(5) – C(6)             | 1.391(3)   |
| C(5) – C(24)            | 1.498(4)   |
| C(6) – H(6)             | 0.9300     |
| C(7) – C(12)            | 1.370(3)   |
| C(7) – C(8)             | 1.387(3)   |
| C(7) – C(22)            | 1.505(3)   |
| C(8) – C(9)             | 1.393(4)   |
| C(8) – H(8)             | 0.9300     |
| C(9) – C(10)            | 1.385(4)   |
| C(10) – C(11)           | 1.375(3)   |
| C(10) – H(10)           | 0.9300     |
| C(11) – C(12)           | 1.373(3)   |
| C(11) – H(11)           | 0.9300     |
| C(20) – H(20A)          | 0.9600     |
| C(20) – H(20B)          | 0.9600     |
| C(20) – H(20C)          | 0.9600     |
| C(22) – C(24)           | 1.540(4)   |
| C(22) – H(22)           | 0.9800     |
| C(23) – H(23A)          | 0.9600     |
| C(23) – H(23B)          | 0.9600     |
| C(23) – H(23C)          | 0.9600     |
| C(24) – H(24)           | 0.9800     |
| C(1) – O(1) – C(20)     | 117.2(3)   |
| O(2) – C(21) – C(22)    | 113.0(2)   |
| O(2) – C(21) – H(21A)   | 109.0      |
| C(22) – C(21) – H(21A)  | 109.0      |
| O(2) – C(21) – H(21B)   | 109.0      |
| C(22) – C(21) – H(21B)  | 109.0      |
| H(21A) – C(21) – H(21B) | 107.8      |
| C(12) – O(3) – C(24)    | 106.26(19) |
| C(9) – O(4) – C(23)     | 118.3(2)   |
| O(1) – C(1) – C(6)      | 116.1(3)   |
| O(1) – C(1) – C(2)      | 124.6(3)   |
| C(6) – C(1) – C(2)      | 119.4(2)   |
| C(3) – C(2) – C(1)      | 119.2(3)   |
| C(3) – C(2) – H(2)      | 120.4      |
| C(1) – C(2) – H(2)      | 120.4      |
| C(4) – C(3) – C(2)      | 121.1(3)   |
| C(4) – C(3) – H(3)      | 119.5      |
| C(2) – C(3) – H(3)      | 119.5      |
| C(3) C(4) – O(2)        | 116.8(2)   |
| C(3) – C(4) – C(5)      | 120.8(2)   |
| O(2) – C(4) – C(5)      | 122.3(2)   |
| C(4) – C(5) – C(6)      | 117.7(3)   |
| C(4) – C(5) – C(24)     | 122.2(2)   |

|                         |            |
|-------------------------|------------|
| C(6) – C(5) – C(24)     | 120.1(2)   |
| C(1) – C(6) – C(5)      | 121.9(3)   |
| C(1) – C(6) – H(6)      | 119.1      |
| C(5) – C(6) – H(6)      | 119.1      |
| C(12) – C(7) – C(8)     | 120.5(2)   |
| C(12) – C(7) – C(22)    | 108.8(2)   |
| C(8) – C(7) – C(22)     | 130.7(2)   |
| C(7) – C(8) – C(9)      | 117.9(3)   |
| C(7) – C(8) – H(8)      | 121.0      |
| C(9) – C(8) – H(8)      | 121.0      |
| O(4) – C(9) – C(10)     | 115.6(2)   |
| O(4) – C(9) – C(8)      | 123.8(3)   |
| C(10) – C(9) – C(8)     | 120.6(3)   |
| C(11) – C(10) – C(9)    | 120.9(3)   |
| C(11) – C(10) – H(10)   | 119.5      |
| C(9) – C(10) – H(10)    | 119.5      |
| C(12) – C(11) – C(10)   | 118.1(3)   |
| C(12) – C(11) – H(11)   | 120.9      |
| C(10) – C(11) – H(11)   | 120.9      |
| C(7) – C(12) – C(11)    | 122.0(3)   |
| C(7) – C(12) – O(3)     | 113.1(2)   |
| C(11) – C(12) – O(3)    | 124.9(2)   |
| O(1) – C(20) – H(20A)   | 109.5      |
| O(1) – C(20) – H(20B)   | 109.5      |
| H(20A) – C(20) – H(20B) | 109.5      |
| O(1) – C(20) – H(20C)   | 109.5      |
| H(20A) – C(20) – H(20C) | 109.5      |
| H(20B) – C(20) – H(20C) | 109.5      |
| C(4) – O(2) – C(21)     | 114.1(2)   |
| C(21) – C(22) – C(7)    | 115.4(2)   |
| C(21) – C(22) – C(24)   | 112.8(2)   |
| C(7) – C(22) – C(24)    | 101.5(2)   |
| C(21) – C(22) – H(22)   | 108.9      |
| C(7) – C(22) – H(22)    | 108.9      |
| C(24) – C(22) – H(22)   | 108.9      |
| O(4) – C(23) – H(23A)   | 109.5      |
| O(4) – C(23) – H(23B)   | 109.5      |
| H(23A) – C(23) – H(23B) | 109.5      |
| O(4) – C(23) – H(23C)   | 109.5      |
| H(23A) – C(23) – H(23C) | 109.5      |
| H(23B) – C(23) – H(23C) | 109.5      |
| O(3) – C(24) – C(5)     | 108.7(2)   |
| O(3) – C(24) – C(22)    | 105.96(19) |
| C(5) – C(24) – C(22)    | 112.7(2)   |
| O(3) – C(24) – H(24)    | 109.8      |
| C(5) – C(24) – H(24)    | 109.8      |
| C(22) – C(24) – H(24)   | 109.8      |

Anisotropic displacement parameters parameters ( $\text{\AA}^2 \times 10^3$ ) for **14cis**. The anisotropic displacement factor exponent takes the form:  $-2 \pi^2 [h^2 a^{*2} U_{11} + \dots + 2 h k a^* b^* U_{12}]$

|     | U11    | U22    | U33   | U23   | U13   | U12    |
|-----|--------|--------|-------|-------|-------|--------|
| O1  | 92(2)  | 88(2)  | 47(1) | 12(1) | 19(1) | 29(1)  |
| O2  | 57(1)  | 50(1)  | 47(1) | 10(1) | 5(1)  | 18(1)  |
| O3  | 62(1)  | 45(1)  | 59(1) | 12(1) | 1(1)  | 14(1)  |
| O4  | 78(2)  | 71(2)  | 66(1) | 3(1)  | -6(1) | -10(1) |
| C1  | 48(2)  | 58(2)  | 46(2) | 3(2)  | 4(1)  | 9(2)   |
| C2  | 61(2)  | 53(2)  | 59(2) | -4(2) | 8(2)  | 17(2)  |
| C3  | 55(2)  | 43(2)  | 55(2) | 9(1)  | 1(1)  | 16(1)  |
| C4  | 39(1)  | 40(2)  | 42(2) | 6(1)  | 5(1)  | 4(1)   |
| C5  | 35(1)  | 44(2)  | 46(2) | 8(2)  | 1(1)  | 8(1)   |
| C6  | 48(2)  | 50(2)  | 50(2) | 14(1) | 3(1)  | 11(1)  |
| C7  | 41(2)  | 38(2)  | 57(2) | 6(1)  | 9(1)  | 16(1)  |
| C8  | 54(2)  | 45(2)  | 55(2) | 7(1)  | 11(1) | 14(2)  |
| C9  | 56(2)  | 40(2)  | 60(2) | -1(2) | -2(2) | 8(1)   |
| C10 | 54(2)  | 40(2)  | 76(2) | 4(2)  | 4(2)  | 5(1)   |
| C11 | 55(2)  | 37(2)  | 69(2) | 14(2) | 12(2) | 11(1)  |
| C12 | 47(2)  | 36(2)  | 56(2) | 9(1)  | 5(1)  | 14(1)  |
| C20 | 63(2)  | 116(1) | 53(2) | -8(2) | 11(2) | 20(1)  |
| C21 | 40(2)  | 51(2)  | 53(2) | 6(1)  | 7(1)  | 7(1)   |
| C22 | 34(1)  | 50(2)  | 60(2) | 3(1)  | 7(1)  | 12(1)  |
| C23 | 104(1) | 87(1)  | 63(1) | 9(2)  | -7(2) | 4(1)   |
| C24 | 41(1)  | 41(2)  | 57(2) | 7(1)  | 3(1)  | 13(1)  |

Hydrogen coordinates ( $\times 10^4$ ) and isotropic displacement parameters ( $\text{\AA}^2 \times 10^3$ ) for **14cis**.

|      | x     | y     | z     | U(eq) |
|------|-------|-------|-------|-------|
| H2   | 1373  | 11968 | 8382  | 69    |
| H3   | 2193  | 12021 | 5933  | 61    |
| H6   | 4453  | 7919  | 8684  | 60    |
| H8   | 2191  | 6613  | 1490  | 61    |
| H10  | -4094 | 2913  | 2935  | 70    |
| H11  | -1756 | 3439  | 5290  | 64    |
| H20A | 2018  | 11984 | 10821 | 117   |
| H20B | 841   | 10619 | 11921 | 117   |

|      |       |       |       |     |
|------|-------|-------|-------|-----|
| H20C | -997  | 10642 | 10417 | 117 |
| H21A | 7966  | 9922  | 4201  | 58  |
| H21B | 5881  | 9254  | 2763  | 58  |
| H22  | 7286  | 7091  | 4000  | 57  |
| H23A | -1349 | 6294  | -406  | 134 |
| H23B | -2961 | 4723  | -1444 | 134 |
| H23C | 257   | 4902  | -727  | 134 |
| H24  | 7363  | 7340  | 6426  | 55  |

Torsión angles [°] for **14cis**.

---

|                              |           |
|------------------------------|-----------|
| C(20) – O(1) – C(1) – C(6)   | -172.3(2) |
| C(20) – O(1) – C(1) – C(2)   | 8.0(4)    |
| O(1) – C(1) – C(2) – C(3)    | 179.9(2)  |
| C(6) – C(1) – C(2) – C(3)    | 0.1(4)    |
| C(1) – C(2) – C(3) – C(4)    | 1.6(4)    |
| C(2) – C(3) – C(4) – O(2)    | 175.6(2)  |
| C(2) – C(3) – C(4) – C(5)    | -1.8(4)   |
| C(3) – C(4) – C(5) – C(6)    | 0.4(3)    |
| O(2) – C(4) – C(5) – C(6)    | -176.9(2) |
| C(3) – C(4) – C(5) – C(24)   | 177.8(2)  |
| O(2) – C(4) – C(5) – C(24)   | 0.5(3)    |
| O(1) – C(1) – C(6) – C(5)    | 178.7(2)  |
| C(2) – C(1) – C(6) – C(5)    | -1.5(4)   |
| C(4) – C(5) – C(6) – C(1)    | 1.3(4)    |
| C(24) – C(5) – C(6) – C(1)   | -176.2(2) |
| C(12) – C(7) – C(8) – C(9)   | -0.3(4)   |
| C(22) – C(7) – C(8) – C(9)   | 177.6(3)  |
| C(23) – O(4) – C(9) – C(10)  | -176.8(3) |
| C(23) – O(4) – C(9) – C(8)   | 3.7(5)    |
| C(7) – C(8) – C(9) – O(4)    | -179.8(3) |
| C(7) – C(8) – C(9) – C(10)   | 0.6(4)    |
| O(4) – C(9) – C(10) – C(11)  | 179.9(3)  |
| C(8) – C(9) – C(10) – C(11)  | -0.5(4)   |
| C(9) – C(10) – C(11) – C(12) | -0.1(4)   |
| C(8) – C(7) – C(12) – C(11)  | -0.2(4)   |
| C(22) – C(7) – C(12) – C(11) | -178.5(2) |
| C(8) – C(7) – C(12) – O(3)   | 178.3(2)  |
| C(22) – C(7) – C(12) – O(3)  | 0.0(3)    |
| C(10) – C(11) – C(12) – C(7) | 0.4(4)    |
| C(10) – C(11) – C(12) – O(3) | -177.9(3) |
| C(24) – O(3) – C(12) – C(7)  | 13.2(3)   |
| C(24) – O(3) – C(12) – C(11) | -168.3(2) |
| C(3) – C(4) – O(2) – C(21)   | 155.1(2)  |
| C(5) – C(4) – O(2) – C(21)   | -27.5(3)  |
| C(22) – C(21) – O(2) – C(4)  | 53.2(3)   |

|                              |           |
|------------------------------|-----------|
| O(2) – C(21) – C(22) – C(7)  | 64.0(3)   |
| O(2) – C(21) – C(22) – C(24) | -52.1(3)  |
| C(12) – C(7) – C(22) – C(21) | -134.6(2) |
| C(8) – C(7) – C(22) – C(21)  | 47.3(4)   |
| C(12) – C(7) – C(22) – C(24) | -12.3(3)  |
| C(8) – C(7) – C(22) – C(24)  | 169.6(3)  |
| C(12) – O(3) – C(24) – C(5)  | 100.9(2)  |
| C(12) – O(3) – C(24) – C(22) | -20.5(3)  |
| C(4) – C(5) – C(24) – O(3)   | -117.3(2) |
| C(6) – C(5) – C(24) – O(3)   | 60.1(3)   |
| C(4) – C(5) – C(24) – C(22)  | -0.1(3)   |
| C(6) – C(5) – C(24) – C(22)  | 177.3(2)  |
| C(21) – C(22) – C(24) – O(3) | 143.7(2)  |
| C(7) – C(22) – C(24) – O(3)  | 19.6(3)   |
| C(21) – C(22) – C(24) – C(5) | 25.0(3)   |
| C(7) – C(22) – C(24) – C(5)  | -99.1(2)  |

**Data for the X-ray structure analysis of 14trans:** Crystal from Hexane/Et<sub>2</sub>O: crystal dimensions 0.270 x 0.150 x 0.080mm; C<sub>17</sub>H<sub>16</sub>O<sub>4</sub> (M= 284.30); triclinic, space group P-1, a= 8.0941(8), b= 8.7487(8), c= 10.2094(10)Å, α= 78.617(2)°, β= 82.940(2)°, γ= 77.161(2)°, V= 688.65(11)Å<sup>3</sup>, Z= 2, Dx= 1,371 Mg/m<sup>3</sup>, μ(Mo+ Kα)= 0.097 mm<sup>-1</sup>. λ= 0.71073Å ( MoKα radiation, SMART APEX CCD single crystal diffractometer). Data collection at 273(2) K, φ and ω scans, 5.18<θ<47.62°. 3775 unique reflections of which 2407 were observed with I>2σ(I). Crystal structure and anisotropic least-squares refinement were carried out with SHELXL-97. The final cycle of full-matrix least-squares refinement based on 2407 reflections and 192 parameters converged to a final value of R1 (F<sup>2</sup>>2σ(F<sup>2</sup>)) = 0.057, wR2 (F<sup>2</sup>>2σ(F<sup>2</sup>)) = 0.1687. Residual electron density 0.364/-0.348eÅ<sup>-3</sup>. Crystallographic data have been deposited with the Cambridge Structural Data Centre as supplementary publication number CCDC 260557.

|                                   |                                               |                     |
|-----------------------------------|-----------------------------------------------|---------------------|
| Identification code               | <b>14trans</b>                                |                     |
| Empirical formula                 | C17 H16 O4                                    |                     |
| Formula_weight                    | 284.30                                        |                     |
| Temperature                       | 273(2) K                                      |                     |
| Wavelength                        | 0.71073 Å                                     |                     |
| Crystal system, space group       | Triclinic, P-1                                |                     |
| Unit cell dimensions              | a = 8.0941(8) Å                               | alpha = 78.617(2) ° |
|                                   | b = 8.7487(8) Å                               | beta = 82.940(2) °  |
|                                   | c = 10.2094(10) Å                             | gamma = 77.161(2) ° |
| Volume                            | 688.65(11) Å <sup>3</sup>                     |                     |
| Z, Calculated density             | 2, 1,371 Mg/m <sup>3</sup>                    |                     |
| Absorption coefficient            | 0.097 mm <sup>-1</sup>                        |                     |
| F (000)                           | 300                                           |                     |
| Crystal size                      | 0.270 x 0.150 x 0.080 mm                      |                     |
| Theta range for data collection   | 5.18 to 47.62 °                               |                     |
| Limiting indices                  | -9<=h<=9, -10<=k<=10, -10<=l<=12              |                     |
| Reflections collected / unique    | 3775 / 2407 [R (int) = 0.0247]                |                     |
| Refinement method                 | Full – matrix least-squares on F <sup>2</sup> |                     |
| Data / restraints / parameters    | 2407/ 0 / 192                                 |                     |
| Goodness-of-fit on F <sup>2</sup> | 1.070                                         |                     |
| Final R indices [I>2sigma (I)]    | R1 = 0.0579, wR2 = 0.1687                     |                     |
| R indices (all data)              | R1 = 0.0810, wR2 = 0.1901                     |                     |
| Largest diff. Peak and hole       | 0.364 and -0.348 e.Å <sup>-3</sup>            |                     |

Atomic coordinates ( $\times 10^4$ ) and equivalent isotropic displacement parameters ( $\text{\AA}^2 \times 10^3$ ) for **14trans**. U (eq) is defined as one third of the trace of the orthogonalized Uij tensor.

---

|     | x        | y       | z       | U(eq)   |
|-----|----------|---------|---------|---------|
| O1  | 15020(1) | 5856(1) | 6733(2) | 60.4(1) |
| O2  | 8222(1)  | 8737(1) | 6510(2) | 60.3(1) |
| O3  | 10555(1) | 6553(1) | 3280(2) | 49.2(1) |
| O4  | 4801(1)  | 7993(1) | 552(2)  | 66.2(1) |
| C1  | 10874(1) | 7315(1) | 5468(1) | 45.2(1) |
| C2  | 12561(1) | 6610(1) | 5586(1) | 46.5(1) |
| C4  | 12397(1) | 7286(1) | 7758(1) | 54.5(1) |
| C5  | 10699(1) | 7980(1) | 7656(1) | 52.0(1) |
| C6  | 9930(1)  | 8003(1) | 6529(1) | 46.0(1) |
| C7  | 7673(1)  | 7569(1) | 3176(1) | 50.9(1) |
| C8  | 9167(1)  | 6855(1) | 2526(1) | 44.6(1) |
| C9  | 9195(1)  | 6503(1) | 1274(1) | 53.9(1) |
| C10 | 7691(1)  | 6911(1) | 662(1)  | 56.1(1) |
| C11 | 6195(1)  | 7641(1) | 1282(1) | 52.7(1) |
| C12 | 6164(1)  | 7952(1) | 2566(1) | 57.8(1) |
| C20 | 15851(1) | 5836(1) | 7893(1) | 67.3(1) |
| C21 | 7319(1)  | 8882(1) | 5339(1) | 54.9(1) |
| C22 | 8133(1)  | 7641(1) | 4540(1) | 61.6(1) |
| C23 | 9958(4)  | 7586(4) | 4244(1) | 62.7(1) |
| C24 | 3245(1)  | 8832(1) | 1119(1) | 70.6(1) |

---

Bond lengths [ $\text{\AA}$ ] and angles [ $^\circ$ ] for **14trans**.

---

|              |          |
|--------------|----------|
| O(1) – C(3)  | 1.376(3) |
| O(1) – C(20) | 1.427(3) |
| O(2) – C(6)  | 1.390(3) |
| O(2) – C(21) | 1.447(3) |
| O(3) – C(8)  | 1.388(3) |
| O(3) – C(23) | 1.435(3) |
| O(4) – C(11) | 1.373(3) |
| O(4) – C(24) | 1.427(3) |
| C(1) – C(2)  | 1.378(3) |
| C(1) – C(6)  | 1.402(4) |
| C(1) – C(23) | 1.483(4) |
| C(2) – C(3)  | 1.380(3) |
| C(2) – H(2)  | 0.9300   |
| C(3) – C(4)  | 1.382(4) |
| C(4) – C(5)  | 1.381(4) |
| C(4) – H(4)  | 0.9300   |

|                      |            |
|----------------------|------------|
| C(5) – C(6)          | 1.369(4)   |
| C(5) – H(5)          | 0.9300     |
| C(7) – C(12)         | 1.384(4)   |
| C(7) – C(8)          | 1.387(4)   |
| C(7) – C(22)         | 1.501(4)   |
| C(8) – C(9)          | 1.369(4)   |
| C(9) – C(10)         | 1.381(4)   |
| C(9) – H(9)          | 0.9300     |
| C(10) – C(11)        | 1.379(4)   |
| C(10) – H(10)        | 0.9300     |
| C(11) – C(12)        | 1.386(4)   |
| C(12) – H(12)        | 0.9300     |
| C(20) – H(20A)       | 0.9600     |
| C(20) – H(20B)       | 0.9600     |
| C(20) – H(20C)       | 0.9600     |
| C(21) – C(22)        | 1.476(4)   |
| C(21) – H(21A)       | 0.9700     |
| C(21) – H(21B)       | 0.9700     |
| C(22) – C(23)        | 1.463(4)   |
| C(22) – H(22)        | 0.9800     |
| C(23) – H(23)        | 0.9800     |
| C(24) – H(24A)       | 0.9600     |
| C(24) – H(24B)       | 0.9600     |
| C(24) – H(24C)       | 0.9600     |
| C(3) – O(1) – C(20)  | 117.0(2)   |
| C(6) – O(2) – C(21)  | 120.62(19) |
| C(8) – O(3) – C(23)  | 101.75(19) |
| C(11) – O(4) – C(24) | 117.6(2)   |
| C(2) – C(1) – C(6)   | 119.3(2)   |
| C(2) – C(1) – C(23)  | 125.9(2)   |
| C(6) – C(1) – C(23)  | 114.5(2)   |
| C(1) – C(2) – C(3)   | 120.8(2)   |
| C(1) – C(2) – H(2)   | 119.6      |
| C(3) – C(2) – H(2)   | 119.6      |
| O(1) – C(3) – C(2)   | 115.9(2)   |
| O(1) – C(3) – C(4)   | 124.5(2)   |
| C(2) – C(3) – C(4)   | 119.6(2)   |
| C(5) – C(4) – C(3)   | 120.1(2)   |
| C(5) – C(4) – H(4)   | 120.0      |
| C(3) – C(4) – H(4)   | 120.0      |
| C(6) – C(5) – C(4)   | 120.5(2)   |
| C(6) – C(5) – H(5)   | 119.7      |
| C(4) – C(5) – H(5)   | 119.7      |
| C(5) – C(6) – O(2)   | 116.6(2)   |
| C(5) – C(6) – C(1)   | 119.8(2)   |
| O(2) – C(6) – C(1)   | 123.7(2)   |
| C(12) – C(7) – C(8)  | 120.5(3)   |
| C(12) – C(7) – C(22) | 134.0(3)   |
| C(8) – C(7) – C(22)  | 105.4(2)   |
| C(9) – C(8) – C(7)   | 121.3(2)   |



|                         |          |
|-------------------------|----------|
| C(9) – C(8) – O(3)      | 125.8(2) |
| C(7) – C(8) – O(3)      | 112.9(2) |
| C(8) – C(9) – C(10)     | 117.9(3) |
| C(8) – C(9) – H(9)      | 121.1    |
| C(10) – C(9) – H(9)     | 121.1    |
| C(11) – C(10) – C(9)    | 121.7(3) |
| C(11) – C(10) – H(10)   | 119.1    |
| C(9) – C(10) – H(10)    | 119.1    |
| O(4) – C(11) – C(10)    | 115.5(2) |
| O(4) – C(11) – C(12)    | 124.4(3) |
| C(10) – C(11) – C(12)   | 120.1(3) |
| C(7) – C(12) – C(11)    | 118.4(3) |
| C(7) – C(12) – H(12)    | 120.8    |
| C(11) – C(12) – H(12)   | 120.8    |
| O(1) – C(20) – H(20A)   | 109.5    |
| O(1) – C(20) – H(20B)   | 109.5    |
| H(20A) – C(20) – H(20B) | 109.5    |
| O(1) – C(20) – H(20C)   | 109.5    |
| H(20A) – C(20) – H(20C) | 109.5    |
| H(20B) – C(20) – H(20C) | 109.5    |
| O(2) – C(21) – C(22)    | 111.0(2) |
| O(2) – C(21) – H(21A)   | 109.4    |
| C(22) – C(21) – H(21A)  | 109.4    |
| O(2) – C(21) – H(21B)   | 109.4    |
| C(22) – C(21) – H(21B)  | 109.4    |
| H(21A) – C(21) – H(21B) | 108.0    |
| C(23) – C(22) – C(21)   | 112.0(3) |
| C(23) – C(22) – C(7)    | 99.6(2)  |
| C(21) – C(22) – C(7)    | 125.1(2) |
| C(23) – C(22) – H(22)   | 106.3    |
| C(21) – C(22) – H(22)   | 106.3    |
| C(7) – C(22) – H(22)    | 106.3    |
| O(3) – C(23) – C(22)    | 107.2(2) |
| O(3) – C(23) – C(1)     | 118.8(2) |
| C(22) – C(23) – C(1)    | 112.9(2) |
| O(3) – C(23) – H(23)    | 105.7    |
| C(22) – C(23) – H(23)   | 105.7    |
| C(1) – C(23) – H(23)    | 105.7    |
| O(4) – C(24) – H(24A)   | 109.5    |
| O(4) – C(24) – H(24B)   | 109.5    |
| H(24A) – C(24) – H(24B) | 109.5    |
| O(4) – C(24) – H(24C)   | 109.5    |
| H(24A) – C(24) – H(24C) | 109.5    |
| H(24B) – C(24) – H(24C) | 109.5    |

Anisotropic displacement parameters parameters ( $\text{\AA}^2 \times 10^3$ ) for **14trans**. The anisotropic displacement factor exponent takes the form:  $-2 \pi^2 [h^2 a^{*2} U_{11} + \dots + 2 h k a^* b^* U_{12}]$

|     | U11   | U22   | U33   | U23    | U13    | U12    |
|-----|-------|-------|-------|--------|--------|--------|
| O1  | 44(1) | 87(1) | 53(1) | -31(1) | -12(1) | 1(1)   |
| O2  | 48(1) | 80(1) | 55(1) | -35(1) | -7(1)  | 4(1)   |
| O3  | 42(1) | 62(1) | 46(1) | -23(1) | -6(1)  | -1(1)  |
| O4  | 46(1) | 94(2) | 61(1) | -33(1) | -15(1) | 3(1)   |
| C1  | 46(1) | 49(2) | 44(1) | -16(1) | -5(1)  | -7(1)  |
| C2  | 46(2) | 53(2) | 44(2) | -21(1) | -1(1)  | -10(1) |
| C3  | 44(1) | 53(2) | 45(2) | -14(1) | -6(1)  | -9(1)  |
| C4  | 59(2) | 67(2) | 41(2) | -20(1) | -8(1)  | -9(1)  |
| C5  | 54(2) | 61(2) | 40(2) | -18(1) | 1(1)   | -4(1)  |
| C6  | 45(1) | 47(1) | 47(2) | -14(1) | -4(1)  | -6(1)  |
| C7  | 46(2) | 63(2) | 45(2) | -21(1) | -6(1)  | -3(1)  |
| C8  | 39(1) | 52(2) | 44(1) | -14(1) | -5(1)  | -5(1)  |
| C9  | 45(2) | 69(2) | 48(2) | -26(1) | -2(1)  | -1(1)  |
| C10 | 54(2) | 72(2) | 45(2) | -26(1) | -6(1)  | -4(1)  |
| C11 | 46(2) | 64(2) | 50(2) | -18(1) | -11(1) | -3(1)  |
| C12 | 43(2) | 77(2) | 54(2) | -28(1) | -2(1)  | -1(1)  |
| C20 | 53(2) | 94(1) | 58(2) | -26(2) | -19(1) | -2(2)  |
| C21 | 48(2) | 66(2) | 52(2) | -24(1) | -8(1)  | -1(1)  |
| C22 | 51(2) | 83(1) | 52(2) | -27(1) | -6(1)  | -2(1)  |
| C23 | 51(2) | 84(1) | 56(2) | -38(2) | -8(1)  | 4(1)   |
| C24 | 44(2) | 98(1) | 68(1) | -26(2) | -12(1) | 3(1)   |

Hydrogen coordinates ( $\times 10^4$ ) and isotropic displacement parameters ( $\text{\AA}^2 \times 10^3$ ) for **14trans**.

|      | x     | y    | z    | U(eq) |
|------|-------|------|------|-------|
| H2   | 13192 | 6149 | 4887 | 55    |
| H4   | 12915 | 7295 | 8520 | 65    |
| H5   | 10072 | 8436 | 8359 | 62    |
| H9   | 10195 | 6005 | 850  | 65    |
| H10  | 7686  | 6688 | -191 | 67    |
| H12  | 5153  | 8407 | 3007 | 69    |
| H20A | 15737 | 6907 | 8040 | 101   |
| H20B | 17035 | 5363 | 7760 | 101   |
| H20C | 15341 | 5226 | 8659 | 101   |
| H21A | 7305  | 9925 | 4791 | 66    |

|      |       |      |      |     |
|------|-------|------|------|-----|
| H21B | 6152  | 8786 | 5618 | 66  |
| H22  | 8020  | 6619 | 5106 | 74  |
| H23  | 10060 | 8654 | 3771 | 75  |
| H24A | 2885  | 8195 | 1937 | 106 |
| H24B | 2389  | 9047 | 497  | 106 |
| H24C | 3415  | 9818 | 1303 | 106 |

Torsión angles [°] for **14trans**.

---

|                              |           |
|------------------------------|-----------|
| C(6) – C(1) – C(2) – C(3)    | -0.2(4)   |
| C(23) – C(1) – C(2) – C(3)   | 172.8(2)  |
| C(20) – O(1) – C(3) – C(2)   | 178.8(2)  |
| C(20) – O(1) – C(3) – C(4)   | 0.5(4)    |
| C(1) – C(2) – C(3) – O(1)    | -179.4(2) |
| C(1) – C(2) – C(3) – C(4)    | -1.1(4)   |
| O(1) – C(3) – C(4) – C(5)    | 180.0(2)  |
| C(2) – C(3) – C(4) – C(5)    | 1.9(4)    |
| C(3) – C(4) – C(5) – C(6)    | -1.3(4)   |
| C(4) – C(5) – C(6) – O(2)    | -179.5(2) |
| C(4) – C(5) – C(6) – C(1)    | 0.0(4)    |
| C(21) – O(2) – C(6) – C(5)   | 177.3(2)  |
| C(21) – O(2) – C(6) – C(1)   | -2.2(4)   |
| C(2) – C(1) – C(6) – C(5)    | 0.7(4)    |
| C(23) – C(1) – C(6) – C(5)   | -173.0(2) |
| C(2) – C(1) – C(6) – O(2)    | -179.8(2) |
| C(23) – C(1) – C(6) – O(2)   | 6.5(4)    |
| C(12) – C(7) – C(8) – C(9)   | -0.3(4)   |
| C(22) – C(7) – C(8) – C(9)   | 175.8(2)  |
| C(12) – C(7) – C(8) – O(3)   | -179.9(2) |
| C(22) – C(7) – C(8) – O(3)   | -3.9(3)   |
| C(23) – O(3) – C(8) – C(9)   | 162.1(3)  |
| C(23) – O(3) – C(8) – C(7)   | -18.3(3)  |
| C(7) – C(8) – C(9) – C(10)   | 1.3(4)    |
| O(3) – C(8) – C(9) – C(10)   | -179.1(2) |
| C(8) – C(9) – C(10) – C(11)  | -0.4(4)   |
| C(24) – O(4) – C(11) – C(10) | -176.4(2) |
| C(24) – O(4) – C(11) – C(12) | 4.5(4)    |
| C(9) – C(10) – C(11) – O(4)  | 179.4(2)  |
| C(9) – C(10) – C(11) – C(12) | -1.5(4)   |
| C(8) – C(7) – C(12) – C(11)  | -1.6(4)   |
| C(22) – C(7) – C(12) – C(11) | -176.3(3) |
| O(4) – C(11) – C(12) – C(7)  | -178.5(2) |
| C(10) – C(11) – C(12) – C(7) | 2.5(4)    |
| C(6) – O(2) – C(21) – C(22)  | 24.4(3)   |
| O(2) – C(21) – C(22) – C(23) | -51.3(3)  |
| O(2) – C(21) – C(22) – C(7)  | -171.5(2) |
| C(12) – C(7) – C(22) – C(23) | -161.0(3) |
| C(8) – C(7) – C(22) – C(23)  | 23.7(3)   |

|                              |           |
|------------------------------|-----------|
| C(12) – C(7) – C(22) – C(21) | -35.4(5)  |
| C(8) – C(7) – C(22) – C(21)  | 149.3(3)  |
| C(8) – O(3) – C(23) – C(22)  | 34.2(3)   |
| C(8) – O(3) – C(23) – C(1)   | 163.6(2)  |
| C(21) – C(22) – C(23) – O(3) | -170.0(2) |
| C(7) – C(22) – C(23) – O(3)  | -35.9(3)  |
| C(21) – C(22) – C(23) – C(1) | 57.3(4)   |
| C(7) – C(22) – C(23) – C(1)  | -168.6(2) |
| C(2) – C(1) – C(23) – O(3)   | 26.4(4)   |
| C(6) – C(1) – C(23) – O(3)   | -160.4(2) |
| C(2) – C(1) – C(23) – C(22)  | 153.1(3)  |
| C(6) – C(1) – C(23) – C(22)  | -33.7(4)  |
